# Supplementary material
Source: PubMed Central journal article supplement (PMC3931001)
Supplement: NIHMS552688-supplement-Supplement1.pdf [file NIHMS552688-supplement-Supplement1.pdf]

## Supplementary Appendix

This appendix has been provided by the authors to give readers additional information about their work.

Supplement to: Bao Y, Han J, Hu FB, et al. Association of nut consumption with total and cause-specific mortality. *N Engl J Med* 2013;369:2001-11. DOI: 10.1056/NEJMoa1307352

## Supplementary Appendix

### Table of Contents:

Page 2: **Author contributions**

Page 3: **Figure S1.** Nonparametric regression curve for the association between nut consumption and total mortality

Page 6: **Table S1.** Categories for causes of death

Page 7: **Table S2.** Time trends of nut consumption during follow-up

Page 8: **Table S3.** Characteristics of person-years by nut consumption among women and men separately

Page 10: **Table S4.** Cause-specific mortality by nut consumption among women and men separately

Page 15: **Table S5.** Sensitivity analyses of the association between nut consumption and total mortality

Page 20: **Table S6.** Array approach sensitivity analysis for unmeasured confounder.  
Scenario: Confounder decreases mortality, and is more prevalent in the exposed.

Page 22: **Table S7.** Array approach sensitivity analysis for unmeasured confounder.  
Scenario: Confounder increases mortality, and is less prevalent in the exposed.

Page 24: **Table S8.** Total and cause-specific mortality by type of nut consumption

Page 37: **Table S9.** Subgroup analysis of association between nut consumption and total mortality

**Author contributions**

Ying Bao and Charles S. Fuchs designed the study. Jiali Han, Frank B. Hu, Edward L. Giovannucci, Meir J. Stampfer, Walter C. Willett, and Charles S. Fuchs gathered the data. Ying Bao analyzed the data. Ying Bao and Charles S. Fuchs vouch for the data and the analysis. Ying Bao wrote the first draft; and all the co-authors contributed to writing the paper. Ying Bao, Frank B. Hu, and Charles S. Fuchs provided funding support to the analysis. All the co-authors decided to publish the paper.

**Figure S1.** Nonparametric regression curve for the association between nut consumption and total mortality. A. Women. B. Men. Multivariate hazard ratios are calculated by restricted cubic spline regression adjusting for age (continuous), Caucasian (yes vs. no), body-mass index (<23, 23-24.9, 25-29.9, 30-34.9,  $\geq 35$  kg/m<sup>2</sup>), physical activity (metabolic-equivalents/week, quintiles), smoking status (never, past, current 1-14 cigarettes/d, current 15-24 cigarettes/d, current  $\geq 25$  cigarettes/d), alcohol consumption (women: 0, 0.1-4.9, 5.0-14.9,  $\geq 15$  g/d; men: 0, 0.1-4.9, 5.0-29.9,  $\geq 30$  g/d), physical examination for screening purposes (yes vs. no), multivitamin use (yes vs. no), current aspirin use (yes vs. no), family history of diabetes mellitus (yes vs. no), family history of myocardial infarction (yes vs. no), family history of cancer (yes vs. no), history of diabetes mellitus (yes vs. no), history of hypertension (yes vs. no), history of hypercholesterolemia (yes vs. no), intake of total energy, red/processed meat, fruits, and vegetables (quintiles), and in women, menopausal status and hormone use (premenopausal, postmenopausal never users, postmenopausal past users, postmenopausal current users). Solid curve represents point estimates and dashed curves represent 95% confidence intervals.

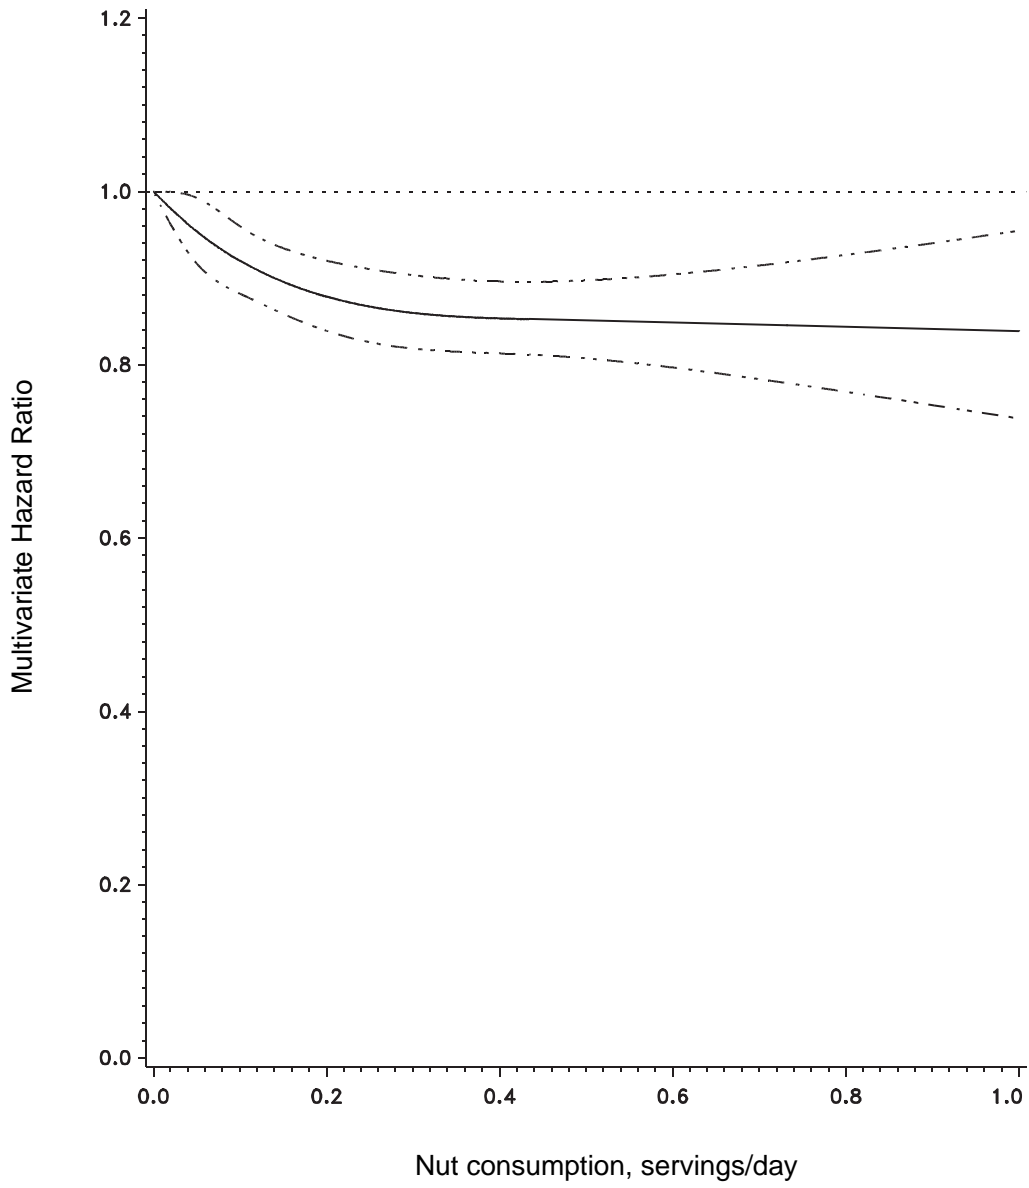

Figure S1 A.

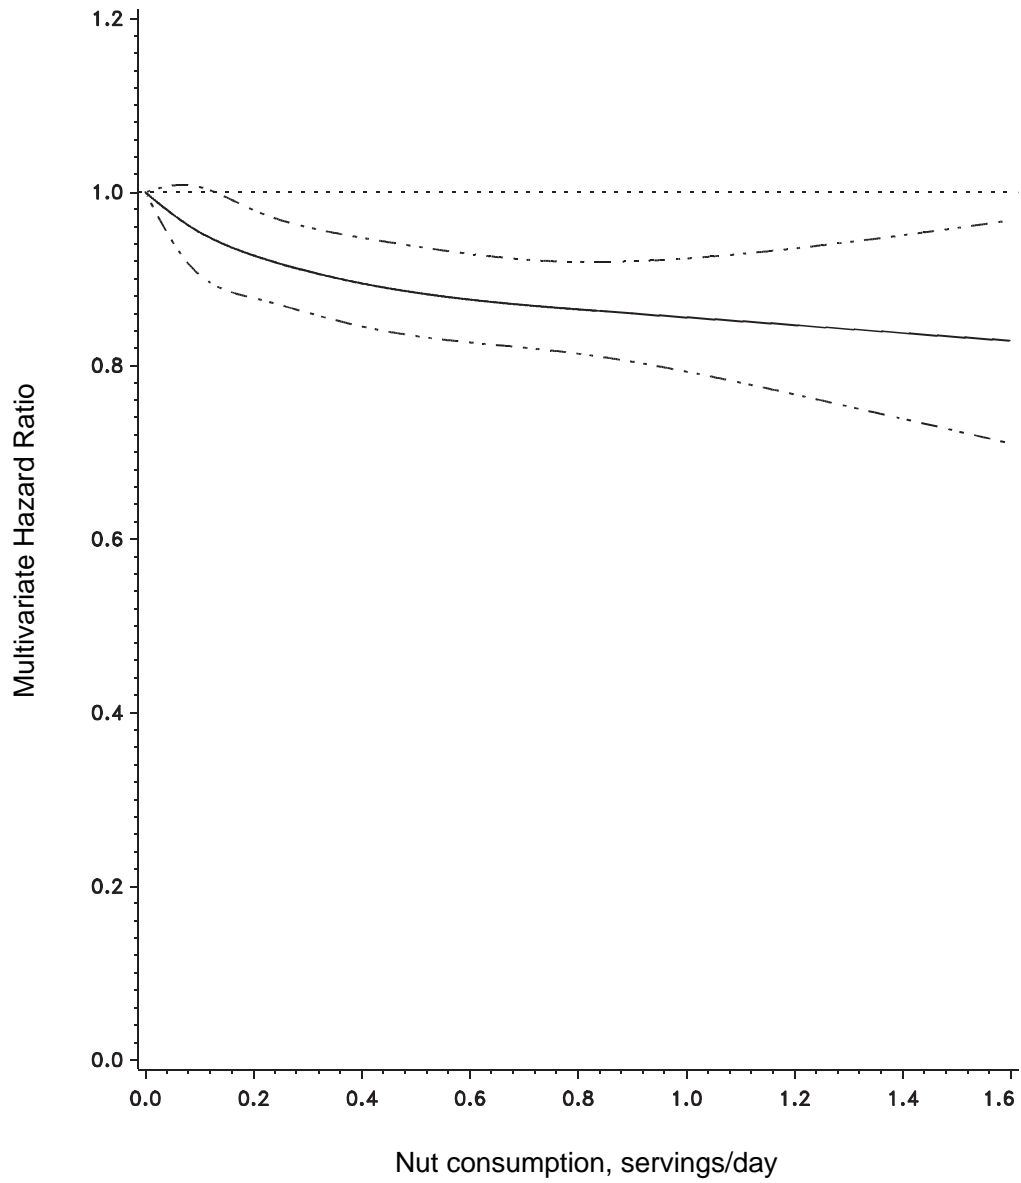

**Figure S1 B.**

**Table S1.** Categories for causes of death

| Causes of death           | ICD-8 code                 | ICD-9 code             |
|---------------------------|----------------------------|------------------------|
| Cancer                    | 140-207                    | 140-208                |
| Cardiovascular disease    | 390-458                    | 390-459                |
| Heart disease             | 390-429 and 440-458        | 390-429 and 440-459    |
| Stroke                    | 430-438                    | 430-438                |
| Respiratory disease       | 460-519                    | 460-519                |
| Neurodegenerative disease | 290, 340, 342, and 348     | 290, 332, 335, and 340 |
| Infections                | 000-136                    | 000-139                |
| Kidney disease            | 580-593                    | 580-593                |
| Diabetes                  | 250                        | 250                    |
| All other causes          | The rest of the ICD codes. |                        |

**Table S2.** Time trends of nut consumption during follow-up

| Median nut intake (servings/day)     | 1980 | 1984 | 1986 | 1990 | 1994 | 1998 | 2002 | 2006 |
|--------------------------------------|------|------|------|------|------|------|------|------|
| Nurses' Health Study                 | 0.07 | 0.07 | 0    | 0    | 0    | 0    | 0.07 | 0.07 |
| Health Professionals Follow-up Study | --   | --   | 0.13 | 0.13 | 0.13 | 0.13 | 0.13 | 0.14 |



**Table S3.** Characteristics of person-years by nut consumption among women and men separately\*

| Characteristics                                 | Frequency of nut consumption (28g serving) |             |           |                |                |               |
|-------------------------------------------------|--------------------------------------------|-------------|-----------|----------------|----------------|---------------|
|                                                 | Never                                      | < Once/week | Once/week | 2-4 times/week | 5-6 times/week | ≥7 times/week |
| Nut intake (servings/day)                       | 0                                          | 0.01-0.09   | 0.10-0.19 | 0.20-0.59      | 0.60-0.89      | ≥0.90         |
| <b>Women</b>                                    |                                            |             |           |                |                |               |
| Age (year)                                      | 56.4±11.1†                                 | 59.5±10.8   | 60.1±10.8 | 61.1±10.7      | 60.5±11.0      | 58.2±11.1     |
| Body-mass index (kg/m <sup>2</sup> )            | 26.1±5.4                                   | 26.1±5.2    | 25.8±5.0  | 25.3±4.8       | 24.7±4.6       | 24.5±4.8      |
| Physical activity (metabolic equivalents/week)  | 14.6±22.4                                  | 16.3±21.4   | 18.2±22.5 | 20.0±24.2      | 20.8±25.9      | 21.9±29.0     |
| Current smoker (%)                              | 19.9                                       | 15.2        | 13.6      | 13.4           | 13.3           | 14.8          |
| Physical examination for screening purposes (%) | 53.2                                       | 62.5        | 63.8      | 64.7           | 60.9           | 55.8          |
| Postmenopausal (%)                              | 60.5                                       | 66.2        | 67.1      | 68.0           | 65.4           | 63.4          |
| Current menopausal hormone use (%)‡             | 26.4                                       | 33.2        | 34.9      | 35.1           | 33.2           | 30.9          |
| Current multivitamin use (%)                    | 43.2                                       | 50.0        | 53.5      | 56.9           | 58.1           | 55.9          |
| Dietary intake                                  |                                            |             |           |                |                |               |
| Alcohol (g/day)                                 | 4.9±9.7                                    | 5.4±9.7     | 6.3±10.3  | 6.9±10.9       | 7.6±11.8       | 7.8±12.2      |
| Red/processed meat (servings/day)               | 1.4±0.8                                    | 1.5±0.8     | 1.5±0.8   | 1.5±0.8        | 1.4±0.9        | 1.4±1.0       |
| Fruit (servings/day)                            | 2.0±1.3                                    | 2.1±1.1     | 2.3±1.2   | 2.5±1.2        | 2.7±1.4        | 2.7±1.6       |
| Vegetables (servings/day)                       | 2.2±1.2                                    | 2.6±1.2     | 2.8±1.2   | 3.0±1.3        | 3.1±1.4        | 2.9±1.5       |
| <b>Men</b>                                      |                                            |             |           |                |                |               |
| Age (year)                                      | 60.9±11.5                                  | 62.8±10.8   | 62.0±10.9 | 63.2±10.9      | 64.7±10.8      | 64.5±11.0     |
| Body-mass index (kg/m <sup>2</sup> )            | 25.8±3.6                                   | 26.0±3.6    | 26.1±3.6  | 25.9±3.6       | 25.7±3.5       | 25.3±3.2      |
| Physical activity (metabolic equivalents/ week) | 28.1±36.5                                  | 32.7±38.7   | 34.6±40.5 | 36.8±41.2      | 37.6±42.6      | 39.1±44.6     |
| Current smoker (%)                              | 8.1                                        | 6.1         | 6.6       | 6.5            | 7.6            | 6.6           |
| Physical examination for screening purposes (%) | 45.4                                       | 55.0        | 53.3      | 55.5           | 53.6           | 52.9          |
| Current multivitamin use (%)                    | 39.3                                       | 46.9        | 46.3      | 49.4           | 50.9           | 49.0          |
| Dietary intake                                  |                                            |             |           |                |                |               |
| Alcohol (g/day)                                 | 9.5±14.2                                   | 10.4±14.2   | 11.6±15.0 | 12.8±15.7      | 14.0±17.1      | 13.8±17.2     |
| Red/processed meat (servings/day)               | 1.0±0.8                                    | 1.0±0.7     | 1.1±0.7   | 1.1±0.8        | 1.2±0.8        | 1.1±0.8       |
| Fruit (servings/day)                            | 2.2±1.5                                    | 2.3±1.3     | 2.4±1.4   | 2.6±1.5        | 2.8±1.6        | 3.0±1.8       |
| Vegetables (servings/day)                       | 2.9±1.6                                    | 3.0±1.5     | 3.2±1.5   | 3.4±1.6        | 3.6±1.7        | 3.7±1.8       |

\*All variables (except age) are age-standardized.

†Mean±SD (for all such values).

‡Current menopausal hormone use among postmenopausal women.

**Table S4.** Cause-specific mortality by nut consumption among women and men separately\*

| Causes of death                             | Frequency of nut consumption (28g serving) |                  |                  |                  |                  | <i>P</i> for trend |
|---------------------------------------------|--------------------------------------------|------------------|------------------|------------------|------------------|--------------------|
|                                             | Never                                      | < Once/week      | Once/week        | 2-4 times/week   | ≥5 times/week    |                    |
| Nut intake (servings/day)                   | 0                                          | 0.01-0.09        | 0.10-0.19        | 0.20-0.59        | ≥0.60            |                    |
| <b>Women</b>                                |                                            |                  |                  |                  |                  |                    |
| No. of person-years                         | 390915                                     | 973667           | 384892           | 311509           | 74499            |                    |
| All causes                                  |                                            |                  |                  |                  |                  |                    |
| No. of deaths                               | 3343                                       | 7486             | 2663             | 2169             | 539              |                    |
| Age-adjusted hazard ratio (95% CI)          | 1.00                                       | 0.69 (0.66–0.71) | 0.59 (0.56–0.62) | 0.54 (0.51–0.57) | 0.62 (0.57–0.68) | <0.001             |
| Multivariate-adjusted hazard ratio (95% CI) | 1.00                                       | 0.94 (0.90–0.98) | 0.88 (0.83–0.92) | 0.85 (0.80–0.90) | 0.84 (0.77–0.92) | <0.001             |
| Cancer                                      |                                            |                  |                  |                  |                  |                    |
| No. of deaths                               | 1299                                       | 2990             | 1102             | 909              | 235              |                    |
| Age-adjusted hazard ratio (95% CI)          | 1.00                                       | 0.74 (0.69–0.79) | 0.67 (0.62–0.72) | 0.63 (0.58–0.69) | 0.75 (0.66–0.87) | <0.001             |
| Multivariate-adjusted hazard ratio (95% CI) | 1.00                                       | 0.94 (0.88–1.01) | 0.91 (0.84–0.99) | 0.89 (0.82–0.98) | 0.94 (0.82–1.09) | 0.20               |
| Cardiovascular disease                      |                                            |                  |                  |                  |                  |                    |
| No. of deaths                               | 740                                        | 1382             | 475              | 391              | 98               |                    |
| Age-adjusted hazard ratio (95% CI)          | 1.00                                       | 0.59 (0.54–0.64) | 0.50 (0.44–0.56) | 0.46 (0.41–0.52) | 0.52 (0.42–0.64) | <0.001             |
| Multivariate-adjusted hazard ratio (95% CI) | 1.00                                       | 0.85 (0.78–0.93) | 0.82 (0.72–0.92) | 0.82 (0.72–0.93) | 0.82 (0.66–1.01) | 0.04               |
| Heart disease                               |                                            |                  |                  |                  |                  |                    |
| No. of deaths                               | 550                                        | 1002             | 332              | 261              | 63               |                    |
| Age-adjusted hazard ratio (95% CI)          | 1.00                                       | 0.57 (0.52–0.64) | 0.47 (0.41–0.54) | 0.41 (0.36–0.48) | 0.45 (0.34–0.58) | <0.001             |
| Multivariate-adjusted hazard ratio (95% CI) | 1.00                                       | 0.84 (0.76–0.94) | 0.79 (0.68–0.90) | 0.76 (0.65–0.88) | 0.72 (0.55–0.94) | 0.003              |
| Stroke                                      |                                            |                  |                  |                  |                  |                    |

|                                             |      |                  |                  |                  |                  |        |
|---------------------------------------------|------|------------------|------------------|------------------|------------------|--------|
| No. of deaths                               | 190  | 380              | 143              | 130              | 35               |        |
| Age-adjusted hazard ratio (95% CI)          | 1.00 | 0.63 (0.53–0.75) | 0.58 (0.47–0.72) | 0.59 (0.47–0.74) | 0.71 (0.50–1.02) | 0.08   |
| Multivariate-adjusted hazard ratio (95% CI) | 1.00 | 0.88 (0.74–1.05) | 0.90 (0.72–1.13) | 0.98 (0.77–1.24) | 1.05 (0.73–1.52) | 0.43   |
| Respiratory disease                         |      |                  |                  |                  |                  |        |
| No. of deaths                               | 245  | 575              | 193              | 146              | 33               |        |
| Age-adjusted hazard ratio (95% CI)          | 1.00 | 0.69 (0.59–0.80) | 0.56 (0.46–0.67) | 0.47 (0.38–0.58) | 0.49 (0.34–0.71) | <0.001 |
| Multivariate-adjusted hazard ratio (95% CI) | 1.00 | 0.99 (0.84–1.15) | 0.86 (0.71–1.04) | 0.74 (0.60–0.92) | 0.65 (0.45–0.94) | <0.001 |
| Neurodegenerative disease                   |      |                  |                  |                  |                  |        |
| No. of deaths                               | 238  | 616              | 235              | 174              | 52               |        |
| Age-adjusted hazard ratio (95% CI)          | 1.00 | 0.71 (0.61–0.82) | 0.63 (0.53–0.76) | 0.51 (0.42–0.62) | 0.72 (0.53–0.97) | <0.001 |
| Multivariate-adjusted hazard ratio (95% CI) | 1.00 | 1.07 (0.92–1.25) | 1.04 (0.87–1.26) | 0.88 (0.72–1.08) | 0.95 (0.70–1.29) | 0.15   |
| Infections                                  |      |                  |                  |                  |                  |        |
| No. of deaths                               | 43   | 108              | 34               | 26               | 6                |        |
| Age-adjusted hazard ratio (95% CI)          | 1.00 | 0.69 (0.49–0.99) | 0.52 (0.33–0.82) | 0.45 (0.28–0.73) | 0.50 (0.21–1.17) | 0.01   |
| Multivariate-adjusted hazard ratio (95% CI) | 1.00 | 0.97 (0.68–1.40) | 0.79 (0.49–1.25) | 0.71 (0.43–1.18) | 0.65 (0.28–1.56) | 0.12   |
| Kidney disease                              |      |                  |                  |                  |                  |        |
| No. of deaths                               | 44   | 88               | 28               | 25               | 6                |        |
| Age-adjusted hazard ratio (95% CI)          | 1.00 | 0.61 (0.42–0.88) | 0.47 (0.29–0.75) | 0.47 (0.29–0.77) | 0.52 (0.22–1.21) | 0.05   |
| Multivariate-adjusted hazard ratio (95% CI) | 1.00 | 0.92 (0.63–1.33) | 0.83 (0.51–1.35) | 0.95 (0.57–1.60) | 0.89 (0.37–2.11) | 0.86   |
| Diabetes                                    |      |                  |                  |                  |                  |        |
| No. of deaths                               | 64   | 104              | 26               | 20               | 6                |        |

|                                             |        |                  |                  |                  |                  |        |
|---------------------------------------------|--------|------------------|------------------|------------------|------------------|--------|
| Age-adjusted hazard ratio (95% CI)          | 1.00   | 0.48 (0.35–0.65) | 0.29 (0.18–0.45) | 0.25 (0.15–0.42) | 0.37 (0.16–0.84) | <0.001 |
| Multivariate-adjusted hazard ratio (95% CI) | 1.00   | 0.86 (0.62–1.20) | 0.68 (0.42–1.10) | 0.70 (0.41–1.18) | 0.83 (0.35–1.96) | 0.34   |
| Other causes                                |        |                  |                  |                  |                  |        |
| No. of deaths                               | 670    | 1623             | 570              | 478              | 103              |        |
| Age-adjusted hazard ratio (95% CI)          | 1.00   | 0.71 (0.65–0.77) | 0.58 (0.52–0.65) | 0.54 (0.48–0.61) | 0.55 (0.45–0.68) | <0.001 |
| Multivariate-adjusted hazard ratio (95% CI) | 1.00   | 0.96 (0.88–1.06) | 0.86 (0.77–0.97) | 0.86 (0.76–0.97) | 0.75 (0.61–0.93) | <0.001 |
| <b>Men</b>                                  |        |                  |                  |                  |                  |        |
| No. of person-years                         | 130848 | 228338           | 217025           | 237617           | 89543            |        |
| All causes                                  |        |                  |                  |                  |                  |        |
| No. of deaths                               | 1860   | 2801             | 2518             | 2843             | 1207             |        |
| Age-adjusted hazard ratio (95% CI)          | 1.00   | 0.74 (0.70–0.79) | 0.76 (0.71–0.80) | 0.69 (0.65–0.73) | 0.68 (0.63–0.73) | <0.001 |
| Multivariate-adjusted hazard ratio (95% CI) | 1.00   | 0.91 (0.85–0.96) | 0.91 (0.86–0.97) | 0.89 (0.83–0.94) | 0.82 (0.76–0.88) | <0.001 |
| Cancer                                      |        |                  |                  |                  |                  |        |
| No. of deaths                               | 584    | 914              | 874              | 989              | 397              |        |
| Age-adjusted hazard ratio (95% CI)          | 1.00   | 0.78 (0.70–0.87) | 0.84 (0.75–0.93) | 0.78 (0.70–0.86) | 0.74 (0.65–0.84) | 0.001  |
| Multivariate-adjusted hazard ratio (95% CI) | 1.00   | 0.91 (0.82–1.01) | 0.98 (0.88–1.09) | 0.95 (0.85–1.05) | 0.86 (0.75–0.98) | 0.09   |
| Cardiovascular disease                      |        |                  |                  |                  |                  |        |
| No. of deaths                               | 615    | 837              | 749              | 825              | 359              |        |
| Age-adjusted hazard ratio (95% CI)          | 1.00   | 0.68 (0.61–0.76) | 0.70 (0.63–0.78) | 0.61 (0.55–0.68) | 0.61 (0.54–0.70) | <0.001 |
| Multivariate-adjusted hazard ratio (95% CI) | 1.00   | 0.82 (0.74–0.91) | 0.83 (0.75–0.93) | 0.77 (0.69–0.86) | 0.73 (0.64–0.83) | <0.001 |
| Heart disease                               |        |                  |                  |                  |                  |        |
| No. of deaths                               | 494    | 691              | 582              | 646              | 285              |        |

|                                             |      |                  |                  |                  |                  |        |
|---------------------------------------------|------|------------------|------------------|------------------|------------------|--------|
| Age-adjusted hazard ratio (95% CI)          | 1.00 | 0.70 (0.62–0.78) | 0.66 (0.59–0.75) | 0.59 (0.52–0.66) | 0.60 (0.52–0.70) | <0.001 |
| Multivariate-adjusted hazard ratio (95% CI) | 1.00 | 0.83 (0.74–0.94) | 0.78 (0.69–0.88) | 0.74 (0.66–0.84) | 0.71 (0.61–0.83) | <0.001 |
| Stroke                                      |      |                  |                  |                  |                  |        |
| No. of deaths                               | 121  | 146              | 167              | 179              | 74               |        |
| Age-adjusted hazard ratio (95% CI)          | 1.00 | 0.60 (0.47–0.77) | 0.80 (0.63–1.01) | 0.67 (0.53–0.85) | 0.64 (0.48–0.86) | 0.09   |
| Multivariate-adjusted hazard ratio (95% CI) | 1.00 | 0.74 (0.58–0.94) | 0.97 (0.77–1.24) | 0.88 (0.69–1.12) | 0.78 (0.58–1.06) | 0.39   |
| Respiratory disease                         |      |                  |                  |                  |                  |        |
| No. of deaths                               | 131  | 194              | 186              | 209              | 89               |        |
| Age-adjusted hazard ratio (95% CI)          | 1.00 | 0.72 (0.58–0.90) | 0.79 (0.63–0.99) | 0.69 (0.56–0.87) | 0.67 (0.51–0.88) | 0.04   |
| Multivariate-adjusted hazard ratio (95% CI) | 1.00 | 0.89 (0.71–1.11) | 0.99 (0.78–1.24) | 0.94 (0.75–1.18) | 0.84 (0.64–1.11) | 0.34   |
| Neurodegenerative disease                   |      |                  |                  |                  |                  |        |
| No. of deaths                               | 89   | 172              | 145              | 170              | 78               |        |
| Age-adjusted hazard ratio (95% CI)          | 1.00 | 0.89 (0.68–1.15) | 0.88 (0.68–1.15) | 0.79 (0.61–1.02) | 0.83 (0.61–1.13) | 0.28   |
| Multivariate-adjusted hazard ratio (95% CI) | 1.00 | 1.23 (0.94–1.59) | 1.20 (0.92–1.57) | 1.17 (0.90–1.53) | 1.01 (0.74–1.39) | 0.42   |
| Infections                                  |      |                  |                  |                  |                  |        |
| No. of deaths                               | 26   | 55               | 39               | 42               | 18               |        |
| Age-adjusted hazard ratio (95% CI)          | 1.00 | 0.96 (0.60–1.53) | 0.75 (0.46–1.24) | 0.67 (0.41–1.10) | 0.67 (0.36–1.24) | 0.12   |
| Multivariate-adjusted hazard ratio (95% CI) | 1.00 | 1.28 (0.79–2.05) | 0.96 (0.58–1.60) | 0.91 (0.55–1.51) | 0.84 (0.44–1.58) | 0.23   |
| Kidney disease                              |      |                  |                  |                  |                  |        |
| No. of deaths                               | 36   | 50               | 45               | 31               | 14               |        |
| Age-adjusted hazard ratio (95% CI)          | 1.00 | 0.65 (0.42–1.01) | 0.66 (0.43–1.03) | 0.35 (0.22–0.57) | 0.37 (0.20–0.68) | <0.001 |

|                                             |      |                  |                  |                  |                  |       |
|---------------------------------------------|------|------------------|------------------|------------------|------------------|-------|
| Multivariate-adjusted hazard ratio (95% CI) | 1.00 | 0.84 (0.54–1.31) | 0.91 (0.58–1.43) | 0.52 (0.31–0.86) | 0.49 (0.26–0.92) | 0.008 |
| Diabetes                                    |      |                  |                  |                  |                  |       |
| No. of deaths                               | 15   | 25               | 13               | 22               | 9                |       |
| Age-adjusted hazard ratio (95% CI)          | 1.00 | 0.75 (0.39–1.43) | 0.45 (0.21–0.94) | 0.59 (0.31–1.15) | 0.59 (0.26–1.36) | 0.41  |
| Multivariate-adjusted hazard ratio (95% CI) | 1.00 | 1.32 (0.65–2.65) | 0.76 (0.34–1.68) | 1.02 (0.49–2.12) | 0.85 (0.35–2.11) | 0.57  |
| Other causes                                |      |                  |                  |                  |                  |       |
| No. of deaths                               | 364  | 554              | 467              | 555              | 243              |       |
| Age-adjusted hazard ratio (95% CI)          | 1.00 | 0.77 (0.67–0.88) | 0.71 (0.62–0.82) | 0.69 (0.61–0.79) | 0.72 (0.61–0.85) | 0.009 |
| Multivariate-adjusted hazard ratio (95% CI) | 1.00 | 0.95 (0.83–1.08) | 0.88 (0.76–1.01) | 0.91 (0.80–1.05) | 0.87 (0.74–1.03) | 0.21  |

\*Multivariate analyses were adjusted for the same covariates as Figure S1.

**Table S5.** Sensitivity analyses of the association between nut consumption and total mortality\*

| Total mortality                                                                        | Frequency of nut consumption (28g serving) |                  |                  |                  |                  |                  | <i>P</i> for trend |
|----------------------------------------------------------------------------------------|--------------------------------------------|------------------|------------------|------------------|------------------|------------------|--------------------|
|                                                                                        | Never                                      | < Once/week      | Once/week        | 2-4 times/week   | 5-6 times/week   | ≥7 times/week    |                    |
| <b>Women</b>                                                                           |                                            |                  |                  |                  |                  |                  |                    |
| Exclude diabetes mellitus at baseline and suspend updating after diagnosis of diabetes |                                            |                  |                  |                  |                  |                  |                    |
| No. of person-years                                                                    | 381708                                     | 957629           | 378617           | 306579           | 43876            | 29068            |                    |
| No. of deaths                                                                          | 3125                                       | 7124             | 2541             | 2073             | 325              | 192              |                    |
| Multivariate-adjusted hazard ratio (95% CI)                                            | 1.00                                       | 0.93 (0.89–0.97) | 0.86 (0.82–0.91) | 0.84 (0.79–0.89) | 0.89 (0.79–0.99) | 0.81 (0.70–0.93) | <0.001             |
| Exclude extreme BMIs (<18.5 or >40 kg/m <sup>2</sup> )                                 |                                            |                  |                  |                  |                  |                  |                    |
| No. of person-years                                                                    | 377278                                     | 947811           | 375662           | 303673           | 43410            | 28677            |                    |
| No. of deaths                                                                          | 3166                                       | 7177             | 2557             | 2095             | 321              | 196              |                    |
| Multivariate-adjusted hazard ratio (95% CI)                                            | 1.00                                       | 0.93 (0.89–0.97) | 0.87 (0.82–0.92) | 0.85 (0.80–0.90) | 0.88 (0.78–0.98) | 0.79 (0.68–0.91) | <0.001             |
| Exclude ever smokers                                                                   |                                            |                  |                  |                  |                  |                  |                    |
| No. of person-years                                                                    | 170958                                     | 445203           | 179076           | 141594           | 21171            | 13138            |                    |
| No. of deaths                                                                          | 1256                                       | 2737             | 1005             | 861              | 135              | 73               |                    |
| Multivariate-adjusted hazard ratio (95% CI)                                            | 1.00                                       | 0.92 (0.86–0.99) | 0.88 (0.81–0.96) | 0.90 (0.82–0.98) | 0.87 (0.73–1.05) | 0.73 (0.58–0.93) | 0.008              |
| Adjust for propensity score for nut intake                                             |                                            |                  |                  |                  |                  |                  |                    |
| No. of person-years                                                                    | 390915                                     | 973667           | 384892           | 311509           | 44677            | 29822            |                    |
| No. of deaths                                                                          | 3343                                       | 7486             | 2663             | 2169             | 337              | 202              |                    |
| Multivariate-adjusted hazard ratio (95% CI)                                            | 1.00                                       | 0.94 (0.90–0.98) | 0.88 (0.83–0.92) | 0.85 (0.80–0.90) | 0.88 (0.78–0.98) | 0.79 (0.68–0.91) | <0.001             |



Adjust for olive oil and Mediterranean Diet

|                                             |        |                  |                  |                  |                  |                  |        |
|---------------------------------------------|--------|------------------|------------------|------------------|------------------|------------------|--------|
| No. of person-years                         | 390915 | 973667           | 384892           | 311509           | 44677            | 29822            |        |
| No. of deaths                               | 3343   | 7486             | 2663             | 2169             | 337              | 202              |        |
| Multivariate-adjusted hazard ratio (95% CI) | 1.00   | 0.96 (0.92–1.00) | 0.91 (0.86–0.96) | 0.89 (0.84–0.94) | 0.91 (0.82–1.03) | 0.81 (0.70–0.94) | <0.001 |

Adjust for total sodium intake

|                                             |        |                  |                  |                  |                  |                  |        |
|---------------------------------------------|--------|------------------|------------------|------------------|------------------|------------------|--------|
| No. of person-years                         | 390915 | 973667           | 384892           | 311509           | 44677            | 29822            |        |
| No. of deaths                               | 3343   | 7486             | 2663             | 2169             | 337              | 202              |        |
| Multivariate-adjusted hazard ratio (95% CI) | 1.00   | 0.93 (0.89–0.97) | 0.87 (0.83–0.92) | 0.85 (0.80–0.90) | 0.88 (0.79–0.99) | 0.80 (0.69–0.92) | <0.001 |

Continue updating after diagnosis of chronic disease

|                                             |        |                  |                  |                  |                  |                  |        |
|---------------------------------------------|--------|------------------|------------------|------------------|------------------|------------------|--------|
| No. of person-years                         | 367980 | 983453           | 393512           | 317686           | 44468            | 28383            |        |
| No. of deaths                               | 2809   | 7858             | 2847             | 2223             | 295              | 168              |        |
| Multivariate-adjusted hazard ratio (95% CI) | 1.00   | 1.00 (0.96–1.05) | 0.94 (0.89–1.00) | 0.88 (0.83–0.94) | 0.84 (0.74–0.95) | 0.79 (0.68–0.93) | <0.001 |

Continue updating with 2-year lag

|                                             |        |                  |                  |                  |                  |                  |        |
|---------------------------------------------|--------|------------------|------------------|------------------|------------------|------------------|--------|
| No. of person-years                         | 348515 | 905628           | 355686           | 284207           | 40249            | 26147            |        |
| No. of deaths                               | 2777   | 7560             | 2683             | 2134             | 290              | 159              |        |
| Multivariate-adjusted hazard ratio (95% CI) | 1.00   | 1.01 (0.96–1.05) | 0.94 (0.89–1.00) | 0.91 (0.85–0.96) | 0.86 (0.76–0.97) | 0.81 (0.69–0.95) | <0.001 |

**Men**

Exclude diabetes mellitus at baseline and suspend updating after

|                                                        |        |                  |                  |                  |                  |                  |        |
|--------------------------------------------------------|--------|------------------|------------------|------------------|------------------|------------------|--------|
| diagnosis of diabetes                                  |        |                  |                  |                  |                  |                  |        |
| No. of person-years                                    | 127722 | 224274           | 213325           | 232756           | 47910            | 38950            |        |
| No. of deaths                                          | 1726   | 2665             | 2381             | 2688             | 626              | 504              |        |
| Multivariate-adjusted hazard ratio (95% CI)            | 1.00   | 0.91 (0.86–0.97) | 0.92 (0.86–0.97) | 0.89 (0.84–0.95) | 0.85 (0.78–0.93) | 0.81 (0.74–0.90) | <0.001 |
| Exclude extreme BMIs (<18.5 or >40 kg/m <sup>2</sup> ) |        |                  |                  |                  |                  |                  |        |
| No. of person-years                                    | 129751 | 227227           | 215685           | 236404           | 49093            | 39874            |        |
| No. of deaths                                          | 1830   | 2776             | 2489             | 2819             | 663              | 532              |        |
| Multivariate-adjusted hazard ratio (95% CI)            | 1.00   | 0.91 (0.86–0.97) | 0.92 (0.86–0.97) | 0.89 (0.84–0.94) | 0.84 (0.76–0.92) | 0.80 (0.73–0.89) | <0.001 |
| Exclude ever smokers                                   |        |                  |                  |                  |                  |                  |        |
| No. of person-years                                    | 67183  | 118954           | 110535           | 118830           | 24456            | 19138            |        |
| No. of deaths                                          | 741    | 1230             | 1051             | 1204             | 266              | 223              |        |
| Multivariate-adjusted hazard ratio (95% CI)            | 1.00   | 0.99 (0.90–1.08) | 0.96 (0.87–1.06) | 0.94 (0.85–1.03) | 0.79 (0.69–0.91) | 0.79 (0.67–0.92) | <0.001 |
| Adjust for propensity score for nut intake             |        |                  |                  |                  |                  |                  |        |
| No. of person-years                                    | 130848 | 228338           | 217025           | 237617           | 49416            | 40127            |        |
| No. of deaths                                          | 1860   | 2801             | 2518             | 2843             | 671              | 536              |        |
| Multivariate-adjusted hazard ratio (95% CI)            | 1.00   | 0.91 (0.85–0.96) | 0.91 (0.86–0.97) | 0.89 (0.83–0.94) | 0.83 (0.76–0.91) | 0.80 (0.73–0.88) | <0.001 |
| Adjust for olive oil and Mediterranean Diet            |        |                  |                  |                  |                  |                  |        |
| No. of person-years                                    | 130848 | 228338           | 217025           | 237617           | 49416            | 40127            |        |
| No. of deaths                                          | 1860   | 2801             | 2518             | 2843             | 671              | 536              |        |
| Multivariate-adjusted hazard ratio (95% CI)            | 1.00   | 0.92 (0.86–0.97) | 0.93 (0.87–0.99) | 0.91 (0.85–0.97) | 0.86 (0.78–0.94) | 0.82 (0.74–0.91) | <0.001 |

|                                                                                        |        |                  |                  |                  |                  |                  |        |
|----------------------------------------------------------------------------------------|--------|------------------|------------------|------------------|------------------|------------------|--------|
| Adjust for total sodium intake                                                         |        |                  |                  |                  |                  |                  |        |
| No. of person-years                                                                    | 130848 | 228338           | 217025           | 237617           | 49416            | 40127            |        |
| No. of deaths                                                                          | 1860   | 2801             | 2518             | 2843             | 671              | 536              |        |
| Multivariate-adjusted hazard ratio (95% CI)                                            | 1.00   | 0.90 (0.85–0.96) | 0.91 (0.86–0.97) | 0.88 (0.83–0.94) | 0.83 (0.76–0.91) | 0.80 (0.72–0.88) | <0.001 |
| Continue updating after diagnosis of chronic disease                                   |        |                  |                  |                  |                  |                  |        |
| No. of person-years                                                                    | 119701 | 233103           | 217011           | 243788           | 50419            | 39350            |        |
| No. of deaths                                                                          | 1441   | 3045             | 2551             | 3030             | 666              | 496              |        |
| Multivariate-adjusted hazard ratio (95% CI)                                            | 1.00   | 0.97 (0.91–1.04) | 0.95 (0.89–1.02) | 0.91 (0.85–0.97) | 0.85 (0.78–0.94) | 0.83 (0.74–0.92) | <0.001 |
| Continue updating with 2-year lag                                                      |        |                  |                  |                  |                  |                  |        |
| No. of person-years                                                                    | 111668 | 205988           | 192064           | 209516           | 42930            | 34281            |        |
| No. of deaths                                                                          | 1348   | 2709             | 2277             | 2680             | 613              | 449              |        |
| Multivariate-adjusted hazard ratio (95% CI)                                            | 1.00   | 0.98 (0.92–1.05) | 0.96 (0.90–1.03) | 0.94 (0.88–1.01) | 0.91 (0.82–1.00) | 0.86 (0.77–0.96) | 0.001  |
| <b>Pooled†</b>                                                                         |        |                  |                  |                  |                  |                  |        |
| Exclude diabetes mellitus at baseline and suspend updating after diagnosis of diabetes |        |                  |                  |                  |                  |                  |        |
| Multivariate-adjusted hazard ratio (95% CI)                                            | 1.00   | 0.92 (0.89–0.95) | 0.89 (0.84–0.94) | 0.86 (0.81–0.92) | 0.87 (0.81–0.93) | 0.81 (0.75–0.88) | <0.001 |
| Exclude extreme BMIs (<18.5 or >40 kg/m <sup>2</sup> )                                 |        |                  |                  |                  |                  |                  |        |
| Multivariate-adjusted hazard                                                           | 1.00   | 0.92 (0.89–0.96) | 0.89 (0.85–0.94) | 0.87 (0.83–0.91) | 0.85 (0.79–0.91) | 0.80 (0.74–0.87) | <0.001 |

|                                                      |      |                  |                  |                  |                  |                  |        |  |
|------------------------------------------------------|------|------------------|------------------|------------------|------------------|------------------|--------|--|
| ratio (95% CI)                                       |      |                  |                  |                  |                  |                  |        |  |
| Exclude ever smokers                                 |      |                  |                  |                  |                  |                  |        |  |
| Multivariate-adjusted hazard ratio (95% CI)          | 1.00 | 0.95 (0.89–1.01) | 0.92 (0.84–1.00) | 0.92 (0.86–0.98) | 0.82 (0.74–0.92) | 0.77 (0.68–0.88) | <0.001 |  |
| Adjust for propensity score for nut intake           |      |                  |                  |                  |                  |                  |        |  |
| Multivariate-adjusted hazard ratio (95% CI)          | 1.00 | 0.93 (0.89–0.96) | 0.89 (0.86–0.93) | 0.87 (0.83–0.90) | 0.85 (0.79–0.91) | 0.80 (0.73–0.86) | <0.001 |  |
| Adjust for olive oil and Mediterranean Diet          |      |                  |                  |                  |                  |                  |        |  |
| Multivariate-adjusted hazard ratio (95% CI)          | 1.00 | 0.94 (0.90–0.99) | 0.92 (0.88–0.95) | 0.90 (0.86–0.93) | 0.88 (0.82–0.95) | 0.82 (0.76–0.89) | <0.001 |  |
| Adjust for total sodium intake                       |      |                  |                  |                  |                  |                  |        |  |
| Multivariate-adjusted hazard ratio (95% CI)          | 1.00 | 0.92 (0.89–0.96) | 0.89 (0.85–0.93) | 0.86 (0.83–0.90) | 0.85 (0.79–0.91) | 0.80 (0.74–0.87) | <0.001 |  |
| Continue updating after diagnosis of chronic disease |      |                  |                  |                  |                  |                  |        |  |
| Multivariate-adjusted hazard ratio (95% CI)          | 1.00 | 0.99 (0.96–1.03) | 0.95 (0.91–0.99) | 0.90 (0.86–0.94) | 0.85 (0.79–0.91) | 0.82 (0.75–0.89) | <0.001 |  |
| Continue updating with 2-year lag                    |      |                  |                  |                  |                  |                  |        |  |
| Multivariate-adjusted hazard ratio (95% CI)          | 1.00 | 1.00 (0.96–1.04) | 0.95 (0.91–0.99) | 0.92 (0.88–0.96) | 0.89 (0.82–0.96) | 0.85 (0.77–0.93) | 0.006  |  |

\*Multivariate analyses were adjusted for the same covariates as Figure S1.

†Results from the multivariate model were combined using the random-effects model. *P* values for heterogeneity between women and men were > 0.05 for all categories of nut consumption.

**Table S6.** Array approach sensitivity analysis for unmeasured confounder. Scenario: Confounder decreases mortality, and is more prevalent in the exposed. The observed relative risk (ARR) was set as the upper confidence interval of the pooled hazard ratio for nut consumption and total mortality comparing 7 or more time a week vs never (RR=0.80; 95% CI=0.73–0.86). The association between the confounder and total mortality (RR<sub>CD</sub>) was varied from 0.50 to 1.00. The prevalence of the cofounder was varied from 10% to 50%.

Notation:

|                        |                                                       |
|------------------------|-------------------------------------------------------|
| ARR                    | Apparent (or observed) relative risk                  |
| RR <sub>CD</sub>       | Association between confounder and disease outcome    |
| P <sub>C1</sub>        | Prevalence of confounder in the exposed               |
| P <sub>C0</sub>        | Prevalence of confounder in the unexposed             |
| RR <sub>adjusted</sub> | Relative risk when adjusted for unmeasured confounder |

$$RR_{adj.} = \frac{ARR}{\left[ \frac{P_{C1}(RR_{CD} - 1) + 1}{P_{C0}(RR_{CD} - 1) + 1} \right]}$$

Explanation:

For example, an unidentified confounding variable with a relative risk for total mortality of 0.50 would need to have at least a 30% difference in prevalence between extreme categories of nut intake (50% in the 7 or more times per week group and 20% in the never group) to raise the upper 95% confidence limit for adjusted hazard ratio above 1.00. Alternatively, assuming a greater imbalance (40%) in the prevalence of an unmeasured confounder between extreme categories of nut intake (50% in the 7 or more times per week group and 10% in the never group), the unidentified confounder would still require a relative risk for mortality of 0.60 to raise the adjusted upper confidence interval above 1.00.

To compare with an established, strong protective factor of death—physical activity:

A review of 73 studies showed that the hazard ratio for death comparing extreme categories of physical activity was 0.67 in women and 0.71 in men.<sup>1</sup> In the present study, the difference in prevalence of high physical activity (quintile 5 in women, ≥27 MET-hours/week; quintile 5 in men, ≥53 MET-hours/week) between nut consumption of 7 or more times per week and the never group was 8.6% in women and 9.3% in men.

References:

1. Physical Activity Guidelines Advisory Committee report, 2010. Washington, D.C.: US Department of Health and Human Services.

| ARR  | RR <sub>CD</sub> | P <sub>C1</sub> | P <sub>C0</sub> | RR <sub>adjusted</sub> |                 |                        |                 |                        |                 |                        |                 |                        |
|------|------------------|-----------------|-----------------|------------------------|-----------------|------------------------|-----------------|------------------------|-----------------|------------------------|-----------------|------------------------|
| 0.86 | 0.50             | 0.10            | 0.10            | 0.86                   |                 |                        |                 |                        |                 |                        |                 |                        |
| 0.86 | 0.60             | 0.10            | 0.10            | 0.86                   |                 |                        |                 |                        |                 |                        |                 |                        |
| 0.86 | 0.70             | 0.10            | 0.10            | 0.86                   |                 |                        |                 |                        |                 |                        |                 |                        |
| 0.86 | 0.80             | 0.10            | 0.10            | 0.86                   |                 |                        |                 |                        |                 |                        |                 |                        |
| 0.86 | 0.90             | 0.10            | 0.10            | 0.86                   |                 |                        |                 |                        |                 |                        |                 |                        |
| 0.86 | 1.00             | 0.10            | 0.10            | 0.86                   | P <sub>C0</sub> | RR <sub>adjusted</sub> |                 |                        |                 |                        |                 |                        |
| 0.86 | 0.50             | 0.20            | 0.10            | 0.91                   | 0.20            | 0.86                   |                 |                        |                 |                        |                 |                        |
| 0.86 | 0.60             | 0.20            | 0.10            | 0.90                   | 0.20            | 0.86                   |                 |                        |                 |                        |                 |                        |
| 0.86 | 0.70             | 0.20            | 0.10            | 0.89                   | 0.20            | 0.86                   |                 |                        |                 |                        |                 |                        |
| 0.86 | 0.80             | 0.20            | 0.10            | 0.88                   | 0.20            | 0.86                   |                 |                        |                 |                        |                 |                        |
| 0.86 | 0.90             | 0.20            | 0.10            | 0.87                   | 0.20            | 0.86                   |                 |                        |                 |                        |                 |                        |
| 0.86 | 1.00             | 0.20            | 0.10            | 0.86                   | 0.20            | 0.86                   | P <sub>C0</sub> | RR <sub>adjusted</sub> |                 |                        |                 |                        |
| 0.86 | 0.50             | 0.30            | 0.10            | 0.96                   | 0.20            | 0.91                   | 0.30            | 0.86                   |                 |                        |                 |                        |
| 0.86 | 0.60             | 0.30            | 0.10            | 0.94                   | 0.20            | 0.90                   | 0.30            | 0.86                   |                 |                        |                 |                        |
| 0.86 | 0.70             | 0.30            | 0.10            | 0.92                   | 0.20            | 0.89                   | 0.30            | 0.86                   |                 |                        |                 |                        |
| 0.86 | 0.80             | 0.30            | 0.10            | 0.90                   | 0.20            | 0.88                   | 0.30            | 0.86                   |                 |                        |                 |                        |
| 0.86 | 0.90             | 0.30            | 0.10            | 0.88                   | 0.20            | 0.87                   | 0.30            | 0.86                   |                 |                        |                 |                        |
| 0.86 | 1.00             | 0.30            | 0.10            | 0.86                   | 0.20            | 0.86                   | 0.30            | 0.86                   | P <sub>C0</sub> | RR <sub>adjusted</sub> |                 |                        |
| 0.86 | 0.50             | 0.40            | 0.10            | 1.02                   | 0.20            | 0.97                   | 0.30            | 0.91                   | 0.40            | 0.86                   |                 |                        |
| 0.86 | 0.60             | 0.40            | 0.10            | 0.98                   | 0.20            | 0.94                   | 0.30            | 0.90                   | 0.40            | 0.86                   |                 |                        |
| 0.86 | 0.70             | 0.40            | 0.10            | 0.95                   | 0.20            | 0.92                   | 0.30            | 0.89                   | 0.40            | 0.86                   |                 |                        |
| 0.86 | 0.80             | 0.40            | 0.10            | 0.92                   | 0.20            | 0.90                   | 0.30            | 0.88                   | 0.40            | 0.86                   |                 |                        |
| 0.86 | 0.90             | 0.40            | 0.10            | 0.89                   | 0.20            | 0.88                   | 0.30            | 0.87                   | 0.40            | 0.86                   |                 |                        |
| 0.86 | 1.00             | 0.40            | 0.10            | 0.86                   | 0.20            | 0.86                   | 0.30            | 0.86                   | 0.40            | 0.86                   | P <sub>C0</sub> | RR <sub>adjusted</sub> |
| 0.86 | 0.50             | 0.50            | 0.10            | 1.09                   | 0.20            | 1.03                   | 0.30            | 0.97                   | 0.40            | 0.92                   | 0.50            | 0.86                   |
| 0.86 | 0.60             | 0.50            | 0.10            | 1.03                   | 0.20            | 0.99                   | 0.30            | 0.95                   | 0.40            | 0.90                   | 0.50            | 0.86                   |
| 0.86 | 0.70             | 0.50            | 0.10            | 0.98                   | 0.20            | 0.95                   | 0.30            | 0.92                   | 0.40            | 0.89                   | 0.50            | 0.86                   |
| 0.86 | 0.80             | 0.50            | 0.10            | 0.94                   | 0.20            | 0.92                   | 0.30            | 0.90                   | 0.40            | 0.88                   | 0.50            | 0.86                   |
| 0.86 | 0.90             | 0.50            | 0.10            | 0.90                   | 0.20            | 0.89                   | 0.30            | 0.88                   | 0.40            | 0.87                   | 0.50            | 0.86                   |
| 0.86 | 1.00             | 0.50            | 0.10            | 0.86                   | 0.20            | 0.86                   | 0.30            | 0.86                   | 0.40            | 0.86                   | 0.50            | 0.86                   |

**Table S7.** Array approach sensitivity analysis for unmeasured confounder. Scenario: Confounder increases mortality, and is less prevalent in the exposed. The observed relative risk (ARR) was set as the upper confidence interval of the pooled hazard ratio for nut consumption and total mortality comparing 7 or more time a week vs never (RR=0.80; 95% CI=0.73–0.86). The association between the confounder and total mortality (RR<sub>CD</sub>) was varied from 1.00 to 3.50. The prevalence of the cofounder was varied from 10% to 50%.

Notation:

|                        |                                                       |
|------------------------|-------------------------------------------------------|
| ARR                    | Apparent (or observed) relative risk                  |
| RR <sub>CD</sub>       | Association between confounder and disease outcome    |
| P <sub>C1</sub>        | Prevalence of confounder in the exposed               |
| P <sub>C0</sub>        | Prevalence of confounder in the unexposed             |
| RR <sub>adjusted</sub> | Relative risk when adjusted for unmeasured confounder |

$$RR_{adj.} = \frac{ARR}{\frac{P_{C1}(RR_{CD} - 1) + 1}{P_{C0}(RR_{CD} - 1) + 1}}$$

Explanation:

For example, an unidentified confounding variable with a relative risk for total mortality of 1.50 would need to have at least a 40% difference in prevalence between extreme categories of nut intake (10% in the 7 or more times per week group and 50% in the never group) to raise the upper 95% confidence limit for adjusted hazard ratio above 1.00. Alternatively, assuming a smaller imbalance (10% in the prevalence of an unmeasured confounder between extreme categories of nut intake (10% in the 7 or more times per week group and 20% in the never group), the unidentified confounder would require a relative risk for mortality of at least 3.00 to raise the adjusted upper confidence interval above 1.00.

To compare with an established, strong risk factor of death—cigarette smoking:

The hazard ratio for death comparing current smokers to never smokers was 1.35-3.00 in women and 1.76-2.80 in men.<sup>2,3</sup> In the present study, the difference in prevalence of current smoking between nut consumption of 7 or more times per week and the never group was 5.1% in women and 1.5% in men.

References:

2. Jha P, Ramasundarahettige C, Landsman V, Rostron B, Thun M, Anderson RN, McAfee T, Peto R. 21st-century hazards of smoking and benefits of cessation in the United States. *N Engl J Med.* 2013;368(4):341-50.
3. Thun MJ, Carter BD, Feskanich D, Freedman ND, Prentice R, Lopez AD, Hartge P, Gapstur SM. 50-year trends in smoking-related mortality in the United States. *N Engl J Med.* 2013;368(4):351-64.

| ARR  | RR <sub>CD</sub> | P <sub>C1</sub> | P <sub>C0</sub> | RR <sub>adjusted</sub> |                 |                        |                 |                        |                 |                        |                 |                        |
|------|------------------|-----------------|-----------------|------------------------|-----------------|------------------------|-----------------|------------------------|-----------------|------------------------|-----------------|------------------------|
| 0.86 | 1.00             | 0.50            | 0.50            | 0.86                   |                 |                        |                 |                        |                 |                        |                 |                        |
| 0.86 | 1.50             | 0.50            | 0.50            | 0.86                   |                 |                        |                 |                        |                 |                        |                 |                        |
| 0.86 | 2.00             | 0.50            | 0.50            | 0.86                   |                 |                        |                 |                        |                 |                        |                 |                        |
| 0.86 | 2.50             | 0.50            | 0.50            | 0.86                   |                 |                        |                 |                        |                 |                        |                 |                        |
| 0.86 | 3.00             | 0.50            | 0.50            | 0.86                   |                 |                        |                 |                        |                 |                        |                 |                        |
| 0.86 | 3.50             | 0.50            | 0.50            | 0.86                   | P <sub>C0</sub> | RR <sub>adjusted</sub> |                 |                        |                 |                        |                 |                        |
| 0.86 | 1.00             | 0.40            | 0.50            | 0.86                   | 0.40            | 0.86                   |                 |                        |                 |                        |                 |                        |
| 0.86 | 1.50             | 0.40            | 0.50            | 0.90                   | 0.40            | 0.86                   |                 |                        |                 |                        |                 |                        |
| 0.86 | 2.00             | 0.40            | 0.50            | 0.92                   | 0.40            | 0.86                   |                 |                        |                 |                        |                 |                        |
| 0.86 | 2.50             | 0.40            | 0.50            | 0.94                   | 0.40            | 0.86                   |                 |                        |                 |                        |                 |                        |
| 0.86 | 3.00             | 0.40            | 0.50            | 0.96                   | 0.40            | 0.86                   |                 |                        |                 |                        |                 |                        |
| 0.86 | 3.50             | 0.40            | 0.50            | 0.97                   | 0.40            | 0.86                   | P <sub>C0</sub> | RR <sub>adjusted</sub> |                 |                        |                 |                        |
| 0.86 | 1.00             | 0.30            | 0.50            | 0.86                   | 0.40            | 0.86                   | 0.30            | 0.86                   |                 |                        |                 |                        |
| 0.86 | 1.50             | 0.30            | 0.50            | 0.93                   | 0.40            | 0.90                   | 0.30            | 0.86                   |                 |                        |                 |                        |
| 0.86 | 2.00             | 0.30            | 0.50            | 0.99                   | 0.40            | 0.93                   | 0.30            | 0.86                   |                 |                        |                 |                        |
| 0.86 | 2.50             | 0.30            | 0.50            | 1.04                   | 0.40            | 0.95                   | 0.30            | 0.86                   |                 |                        |                 |                        |
| 0.86 | 3.00             | 0.30            | 0.50            | 1.08                   | 0.40            | 0.97                   | 0.30            | 0.86                   |                 |                        |                 |                        |
| 0.86 | 3.50             | 0.30            | 0.50            | 1.11                   | 0.40            | 0.98                   | 0.30            | 0.86                   | P <sub>C0</sub> | RR <sub>adjusted</sub> |                 |                        |
| 0.86 | 1.00             | 0.20            | 0.50            | 0.86                   | 0.40            | 0.86                   | 0.30            | 0.86                   | 0.20            | 0.86                   |                 |                        |
| 0.86 | 1.50             | 0.20            | 0.50            | 0.98                   | 0.40            | 0.94                   | 0.30            | 0.90                   | 0.20            | 0.86                   |                 |                        |
| 0.86 | 2.00             | 0.20            | 0.50            | 1.08                   | 0.40            | 1.00                   | 0.30            | 0.93                   | 0.20            | 0.86                   |                 |                        |
| 0.86 | 2.50             | 0.20            | 0.50            | 1.16                   | 0.40            | 1.06                   | 0.30            | 0.96                   | 0.20            | 0.86                   |                 |                        |
| 0.86 | 3.00             | 0.20            | 0.50            | 1.23                   | 0.40            | 1.11                   | 0.30            | 0.98                   | 0.20            | 0.86                   |                 |                        |
| 0.86 | 3.50             | 0.20            | 0.50            | 1.29                   | 0.40            | 1.15                   | 0.30            | 1.00                   | 0.20            | 0.86                   | P <sub>C0</sub> | RR <sub>adjusted</sub> |
| 0.86 | 1.00             | 0.10            | 0.50            | 0.86                   | 0.40            | 0.86                   | 0.30            | 0.86                   | 0.20            | 0.86                   | 0.10            | 0.86                   |
| 0.86 | 1.50             | 0.10            | 0.50            | 1.02                   | 0.40            | 0.98                   | 0.30            | 0.94                   | 0.20            | 0.90                   | 0.10            | 0.86                   |
| 0.86 | 2.00             | 0.10            | 0.50            | 1.17                   | 0.40            | 1.09                   | 0.30            | 1.02                   | 0.20            | 0.94                   | 0.10            | 0.86                   |
| 0.86 | 2.50             | 0.10            | 0.50            | 1.31                   | 0.40            | 1.20                   | 0.30            | 1.08                   | 0.20            | 0.97                   | 0.10            | 0.86                   |
| 0.86 | 3.00             | 0.10            | 0.50            | 1.43                   | 0.40            | 1.29                   | 0.30            | 1.15                   | 0.20            | 1.00                   | 0.10            | 0.86                   |
| 0.86 | 3.50             | 0.10            | 0.50            | 1.55                   | 0.40            | 1.38                   | 0.30            | 1.20                   | 0.20            | 1.03                   | 0.10            | 0.86                   |



**Table S8.** Total and cause-specific mortality by type of nut consumption\*

| Causes of deaths                            | Frequency of nut consumption (28g serving) |                  |                  |                  | <i>P</i> for trend |
|---------------------------------------------|--------------------------------------------|------------------|------------------|------------------|--------------------|
|                                             | Never                                      | < Once/week      | Once/week        | ≥2 times/week    |                    |
| Nut intake (servings/day)                   | 0                                          | 0.01-0.09        | 0.10-0.19        | ≥0.20            |                    |
| <b>Women</b>                                |                                            |                  |                  |                  |                    |
| No. of person-years                         |                                            |                  |                  |                  |                    |
| Any nut                                     | 390915                                     | 973667           | 384892           | 386008           |                    |
| Peanut                                      | 440789                                     | 585617           | 137443           | 117217           |                    |
| Tree nut                                    | 530238                                     | 558224           | 110379           | 82225            |                    |
| All causes                                  |                                            |                  |                  |                  |                    |
| Any nut                                     |                                            |                  |                  |                  |                    |
| No. of deaths                               | 3343                                       | 7486             | 2663             | 2708             |                    |
| Multivariate-adjusted hazard ratio (95% CI) | 1.00                                       | 0.94 (0.90–0.98) | 0.88 (0.83–0.92) | 0.85 (0.80–0.89) | <0.001             |
| Peanut                                      |                                            |                  |                  |                  |                    |
| No. of deaths                               | 4263                                       | 4889             | 976              | 873              |                    |
| Multivariate-adjusted hazard ratio (95% CI) | 1.00                                       | 0.92 (0.88–0.96) | 0.88 (0.82–0.94) | 0.91 (0.84–0.98) | 0.01               |
| Tree nut                                    |                                            |                  |                  |                  |                    |
| No. of deaths                               | 4800                                       | 4834             | 798              | 569              |                    |
| Multivariate-adjusted hazard ratio (95% CI) | 1.00                                       | 0.95 (0.92–1.00) | 0.90 (0.83–0.97) | 0.82 (0.75–0.90) | <0.001             |
| Cancer                                      |                                            |                  |                  |                  |                    |
| Any nut                                     |                                            |                  |                  |                  |                    |
| No. of deaths                               | 1299                                       | 2990             | 1102             | 1144             |                    |
| Multivariate-adjusted hazard ratio (95% CI) | 1.00                                       | 0.94 (0.88–1.01) | 0.91 (0.84–0.99) | 0.90 (0.83–0.98) | 0.05               |
| Peanut                                      |                                            |                  |                  |                  |                    |
| No. of deaths                               | 1592                                       | 1911             | 398              | 367              |                    |
| Multivariate-adjusted                       | 1.00                                       | 0.94 (0.88–1.00) | 0.93 (0.83–1.04) | 0.97 (0.86–1.09) | 0.69               |

|                                             |      | hazard ratio (95% CI) |                  |                  |  |        |
|---------------------------------------------|------|-----------------------|------------------|------------------|--|--------|
| Tree nut                                    |      |                       |                  |                  |  |        |
| No. of deaths                               | 1842 | 1866                  | 334              | 226              |  |        |
| Multivariate-adjusted hazard ratio (95% CI) | 1.00 | 0.95 (0.89–1.01)      | 0.96 (0.85–1.09) | 0.83 (0.72–0.96) |  | 0.02   |
| Heart disease                               |      |                       |                  |                  |  |        |
| Any nut                                     |      |                       |                  |                  |  |        |
| No. of deaths                               | 550  | 1002                  | 332              | 324              |  |        |
| Multivariate-adjusted hazard ratio (95% CI) | 1.00 | 0.84 (0.76–0.94)      | 0.79 (0.68–0.90) | 0.75 (0.65–0.87) |  | 0.001  |
| Peanut                                      |      |                       |                  |                  |  |        |
| No. of deaths                               | 630  | 615                   | 130              | 98               |  |        |
| Multivariate-adjusted hazard ratio (95% CI) | 1.00 | 0.89 (0.79–1.00)      | 0.91 (0.75–1.11) | 0.81 (0.65–1.01) |  | 0.07   |
| Tree nut                                    |      |                       |                  |                  |  |        |
| No. of deaths                               | 737  | 563                   | 113              | 60               |  |        |
| Multivariate-adjusted hazard ratio (95% CI) | 1.00 | 0.83 (0.74–0.93)      | 1.00 (0.82–1.23) | 0.73 (0.56–0.96) |  | 0.04   |
| Respiratory disease                         |      |                       |                  |                  |  |        |
| Any nut                                     |      |                       |                  |                  |  |        |
| No. of deaths                               | 245  | 575                   | 193              | 179              |  |        |
| Multivariate-adjusted hazard ratio (95% CI) | 1.00 | 0.98 (0.84–1.15)      | 0.86 (0.71–1.04) | 0.72 (0.59–0.89) |  | <0.001 |
| Peanut                                      |      |                       |                  |                  |  |        |
| No. of deaths                               | 350  | 371                   | 67               | 67               |  |        |
| Multivariate-adjusted hazard ratio (95% CI) | 1.00 | 0.89 (0.77–1.03)      | 0.73 (0.56–0.96) | 0.79 (0.61–1.04) |  | 0.06   |
| Tree nut                                    |      |                       |                  |                  |  |        |
| No. of deaths                               | 359  | 409                   | 46               | 41               |  |        |
| Multivariate-adjusted hazard ratio (95% CI) | 1.00 | 1.11 (0.96–1.29)      | 0.72 (0.53–0.98) | 0.82 (0.59–1.15) |  | 0.09   |

Neurodegenerative disease

Any nut

|                                             |      |                  |                  |                  |      |
|---------------------------------------------|------|------------------|------------------|------------------|------|
| No. of deaths                               | 238  | 616              | 235              | 226              |      |
| Multivariate-adjusted hazard ratio (95% CI) | 1.00 | 1.07 (0.92–1.25) | 1.04 (0.87–1.26) | 0.90 (0.74–1.09) | 0.10 |

Peanut

|                                             |      |                  |                  |                  |      |
|---------------------------------------------|------|------------------|------------------|------------------|------|
| No. of deaths                               | 369  | 461              | 88               | 65               |      |
| Multivariate-adjusted hazard ratio (95% CI) | 1.00 | 1.08 (0.94–1.24) | 1.03 (0.81–1.30) | 0.91 (0.70–1.20) | 0.48 |

Tree nut

|                                             |      |                  |                  |                  |      |
|---------------------------------------------|------|------------------|------------------|------------------|------|
| No. of deaths                               | 423  | 465              | 48               | 47               |      |
| Multivariate-adjusted hazard ratio (95% CI) | 1.00 | 1.06 (0.93–1.22) | 0.65 (0.48–0.88) | 0.81 (0.60–1.11) | 0.05 |

Stroke

Any nut

|                                             |      |                  |                  |                  |      |
|---------------------------------------------|------|------------------|------------------|------------------|------|
| No. of deaths                               | 190  | 380              | 143              | 165              |      |
| Multivariate-adjusted hazard ratio (95% CI) | 1.00 | 0.88 (0.74–1.05) | 0.90 (0.72–1.13) | 0.99 (0.80–1.24) | 0.51 |

Peanut

|                                             |      |                  |                  |                  |      |
|---------------------------------------------|------|------------------|------------------|------------------|------|
| No. of deaths                               | 243  | 258              | 55               | 59               |      |
| Multivariate-adjusted hazard ratio (95% CI) | 1.00 | 0.92 (0.76–1.10) | 0.94 (0.70–1.26) | 1.18 (0.88–1.59) | 0.22 |

Tree nut

|                                             |      |                  |                  |                  |      |
|---------------------------------------------|------|------------------|------------------|------------------|------|
| No. of deaths                               | 285  | 249              | 41               | 40               |      |
| Multivariate-adjusted hazard ratio (95% CI) | 1.00 | 0.87 (0.73–1.04) | 0.84 (0.60–1.18) | 1.09 (0.77–1.53) | 0.71 |

Infections

Any nut

|                                             |      |                  |                  |                  |      |
|---------------------------------------------|------|------------------|------------------|------------------|------|
| No. of deaths                               | 43   | 108              | 34               | 32               |      |
| Multivariate-adjusted hazard ratio (95% CI) | 1.00 | 0.97 (0.68–1.40) | 0.79 (0.49–1.25) | 0.70 (0.43–1.13) | 0.10 |

| hazard ratio (95% CI)                       |      |                  |                  |                  |      |
|---------------------------------------------|------|------------------|------------------|------------------|------|
| Peanut                                      |      |                  |                  |                  |      |
| No. of deaths                               | 70   | 71               | 10               | 12               |      |
| Multivariate-adjusted hazard ratio (95% CI) | 1.00 | 0.71 (0.51–1.00) | 0.44 (0.22–0.88) | 0.67 (0.36–1.26) | 0.17 |
| Tree nut                                    |      |                  |                  |                  |      |
| No. of deaths                               | 71   | 75               | 9                | 8                |      |
| Multivariate-adjusted hazard ratio (95% CI) | 1.00 | 0.90 (0.64–1.27) | 0.58 (0.29–1.18) | 0.67 (0.32–1.43) | 0.20 |
| Kidney disease                              |      |                  |                  |                  |      |
| Any nut                                     |      |                  |                  |                  |      |
| No. of deaths                               | 44   | 88               | 28               | 31               |      |
| Multivariate-adjusted hazard ratio (95% CI) | 1.00 | 0.92 (0.63–1.33) | 0.82 (0.51–1.35) | 0.94 (0.58–1.53) | 0.10 |
| Peanut                                      |      |                  |                  |                  |      |
| No. of deaths                               | 59   | 58               | 10               | 9                |      |
| Multivariate-adjusted hazard ratio (95% CI) | 1.00 | 0.86 (0.59–1.25) | 0.71 (0.36–1.40) | 0.75 (0.37–1.54) | 0.38 |
| Tree nut                                    |      |                  |                  |                  |      |
| No. of deaths                               | 64   | 57               | 9                | 6                |      |
| Multivariate-adjusted hazard ratio (95% CI) | 1.00 | 0.96 (0.66–1.39) | 0.95 (0.46–1.94) | 0.84 (0.35–1.98) | 0.68 |
| Diabetes                                    |      |                  |                  |                  |      |
| Any nut                                     |      |                  |                  |                  |      |
| No. of deaths                               | 64   | 104              | 26               | 26               |      |
| Multivariate-adjusted hazard ratio (95% CI) | 1.00 | 0.86 (0.62–1.20) | 0.68 (0.42–1.10) | 0.72 (0.45–1.17) | 0.10 |
| Peanut                                      |      |                  |                  |                  |      |
| No. of deaths                               | 67   | 55               | 13               | 9                |      |
| Multivariate-adjusted hazard ratio (95% CI) | 1.00 | 0.76 (0.52–1.10) | 1.08 (0.58–2.00) | 0.98 (0.47–2.03) | 0.93 |

|                                             |        |                  |                  |                  |        |
|---------------------------------------------|--------|------------------|------------------|------------------|--------|
| Tree nut                                    |        |                  |                  |                  |        |
| No. of deaths                               | 81     | 46               | 9                | 8                |        |
| Multivariate-adjusted hazard ratio (95% CI) | 1.00   | 0.68 (0.46–1.00) | 0.98 (0.48–2.02) | 1.15 (0.54–2.48) | 0.71   |
| Other causes                                |        |                  |                  |                  |        |
| Any nut                                     |        |                  |                  |                  |        |
| No. of deaths                               | 670    | 1623             | 570              | 581              |        |
| Multivariate-adjusted hazard ratio (95% CI) | 1.00   | 0.96 (0.88–1.06) | 0.86 (0.77–0.97) | 0.84 (0.75–0.94) | <0.001 |
| Peanut                                      |        |                  |                  |                  |        |
| No. of deaths                               | 883    | 1089             | 205              | 187              |        |
| Multivariate-adjusted hazard ratio (95% CI) | 1.00   | 0.91 (0.83–0.99) | 0.80 (0.69–0.94) | 0.87 (0.74–1.03) | 0.08   |
| Tree nut                                    |        |                  |                  |                  |        |
| No. of deaths                               | 938    | 1104             | 189              | 133              |        |
| Multivariate-adjusted hazard ratio (95% CI) | 1.00   | 1.02 (0.93–1.09) | 0.93 (0.79–1.09) | 0.83 (0.69–1.00) | 0.03   |
| <b>Men</b>                                  |        |                  |                  |                  |        |
| No. of person-years                         |        |                  |                  |                  |        |
| Any nut                                     | 130848 | 228338           | 217025           | 327160           |        |
| Peanut                                      | 188628 | 378300           | 148422           | 176957           |        |
| Tree nut                                    | 269600 | 386733           | 123226           | 110694           |        |
| All causes                                  |        |                  |                  |                  |        |
| Any nut                                     |        |                  |                  |                  |        |
| No. of deaths                               | 1860   | 2801             | 2518             | 4050             |        |
| Multivariate-adjusted hazard ratio (95% CI) | 1.00   | 0.91 (0.85–0.96) | 0.91 (0.86–0.97) | 0.87 (0.82–0.92) | <0.001 |
| Peanut                                      |        |                  |                  |                  |        |
| No. of deaths                               | 2631   | 4382             | 1713             | 2286             |        |
| Multivariate-adjusted hazard ratio (95% CI) | 1.00   | 0.91 (0.87–0.96) | 0.93 (0.88–0.99) | 0.86 (0.82–0.92) | <0.001 |

|                                             |      |                  |                  |                  |        |
|---------------------------------------------|------|------------------|------------------|------------------|--------|
| Tree nut                                    |      |                  |                  |                  |        |
| No. of deaths                               | 3616 | 4543             | 1433             | 1387             |        |
| Multivariate-adjusted hazard ratio (95% CI) | 1.00 | 0.94 (0.90–0.98) | 0.95 (0.89–1.01) | 0.84 (0.78–0.89) | <0.001 |
| Cancer                                      |      |                  |                  |                  |        |
| Any nut                                     |      |                  |                  |                  |        |
| No. of deaths                               | 584  | 914              | 874              | 1386             |        |
| Multivariate-adjusted hazard ratio (95% CI) | 1.00 | 0.90 (0.81–1.00) | 0.97 (0.87–1.08) | 0.92 (0.83–1.02) | 0.37   |
| Peanut                                      |      |                  |                  |                  |        |
| No. of deaths                               | 843  | 1444             | 600              | 798              |        |
| Multivariate-adjusted hazard ratio (95% CI) | 1.00 | 0.91 (0.83–0.99) | 1.00 (0.89–1.11) | 0.93 (0.84–1.03) | 0.56   |
| Tree nut                                    |      |                  |                  |                  |        |
| No. of deaths                               | 1204 | 1537             | 493              | 459              |        |
| Multivariate-adjusted hazard ratio (95% CI) | 1.00 | 0.91 (0.84–0.98) | 0.95 (0.85–1.06) | 0.82 (0.73–0.92) | 0.002  |
| Heart disease                               |      |                  |                  |                  |        |
| Any nut                                     |      |                  |                  |                  |        |
| No. of deaths                               | 494  | 691              | 582              | 931              |        |
| Multivariate-adjusted hazard ratio (95% CI) | 1.00 | 0.83 (0.74–0.94) | 0.78 (0.69–0.88) | 0.73 (0.65–0.82) | <0.001 |
| Peanut                                      |      |                  |                  |                  |        |
| No. of deaths                               | 673  | 1045             | 399              | 523              |        |
| Multivariate-adjusted hazard ratio (95% CI) | 1.00 | 0.84 (0.76–0.93) | 0.83 (0.73–0.94) | 0.74 (0.66–0.84) | <0.001 |
| Tree nut                                    |      |                  |                  |                  |        |
| No. of deaths                               | 928  | 1055             | 321              | 327              |        |
| Multivariate-adjusted hazard ratio (95% CI) | 1.00 | 0.85 (0.77–0.93) | 0.85 (0.74–0.97) | 0.76 (0.67–0.87) | <0.001 |

|                                             |      |                  |                  |                  |      |
|---------------------------------------------|------|------------------|------------------|------------------|------|
| Respiratory disease                         |      |                  |                  |                  |      |
| Any nut                                     |      |                  |                  |                  |      |
| No. of deaths                               | 131  | 194              | 186              | 298              |      |
| Multivariate-adjusted hazard ratio (95% CI) | 1.00 | 0.89 (0.71–1.11) | 0.99 (0.78–1.24) | 0.91 (0.73–1.13) | 0.58 |
| Peanut                                      |      |                  |                  |                  |      |
| No. of deaths                               | 186  | 315              | 126              | 166              |      |
| Multivariate-adjusted hazard ratio (95% CI) | 1.00 | 0.94 (0.78–1.13) | 1.03 (0.81–1.30) | 0.87 (0.70–1.08) | 0.23 |
| Tree nut                                    |      |                  |                  |                  |      |
| No. of deaths                               | 247  | 332              | 102              | 106              |      |
| Multivariate-adjusted hazard ratio (95% CI) | 1.00 | 1.03 (0.86–1.22) | 1.00 (0.79–1.27) | 0.94 (0.74–1.20) | 0.54 |
| Neurodegenerative disease                   |      |                  |                  |                  |      |
| Any nut                                     |      |                  |                  |                  |      |
| No. of deaths                               | 89   | 172              | 145              | 248              |      |
| Multivariate-adjusted hazard ratio (95% CI) | 1.00 | 1.23 (0.94–1.59) | 1.20 (0.92–1.57) | 1.12 (0.87–1.44) | 0.85 |
| Peanut                                      |      |                  |                  |                  |      |
| No. of deaths                               | 136  | 250              | 109              | 148              |      |
| Multivariate-adjusted hazard ratio (95% CI) | 1.00 | 1.11 (0.90–1.38) | 1.27 (0.98–1.64) | 1.11 (0.87–1.42) | 0.62 |
| Tree nut                                    |      |                  |                  |                  |      |
| No. of deaths                               | 172  | 285              | 86               | 91               |      |
| Multivariate-adjusted hazard ratio (95% CI) | 1.00 | 1.37 (1.13–1.67) | 1.22 (0.93–1.59) | 1.09 (0.83–1.42) | 0.81 |
| Stroke                                      |      |                  |                  |                  |      |
| Any nut                                     |      |                  |                  |                  |      |
| No. of deaths                               | 121  | 146              | 167              | 253              |      |
| Multivariate-adjusted hazard ratio (95% CI) | 1.00 | 0.74 (0.58–0.94) | 0.97 (0.77–1.24) | 0.85 (0.68–1.07) | 0.67 |

| hazard ratio (95% CI)                       |      |                  |                  |                  |        |
|---------------------------------------------|------|------------------|------------------|------------------|--------|
| Peanut                                      |      |                  |                  |                  |        |
| No. of deaths                               | 172  | 271              | 94               | 141              |        |
| Multivariate-adjusted hazard ratio (95% CI) | 1.00 | 0.89 (0.73–1.08) | 0.82 (0.64–1.07) | 0.81 (0.65–1.03) | 0.14   |
| Tree nut                                    |      |                  |                  |                  |        |
| No. of deaths                               | 212  | 278              | 94               | 87               |        |
| Multivariate-adjusted hazard ratio (95% CI) | 1.00 | 1.02 (0.85–1.23) | 1.11 (0.86–1.42) | 0.90 (0.69–1.17) | 0.39   |
| Infections                                  |      |                  |                  |                  |        |
| Any nut                                     |      |                  |                  |                  |        |
| No. of deaths                               | 26   | 55               | 39               | 60               |        |
| Multivariate-adjusted hazard ratio (95% CI) | 1.00 | 1.28 (0.79–2.05) | 0.96 (0.58–1.60) | 0.89 (0.55–1.44) | 0.19   |
| Peanut                                      |      |                  |                  |                  |        |
| No. of deaths                               | 42   | 79               | 30               | 28               |        |
| Multivariate-adjusted hazard ratio (95% CI) | 1.00 | 0.98 (0.67–1.45) | 0.90 (0.55–1.46) | 0.68 (0.42–1.12) | 0.09   |
| Tree nut                                    |      |                  |                  |                  |        |
| No. of deaths                               | 52   | 79               | 27               | 20               |        |
| Multivariate-adjusted hazard ratio (95% CI) | 1.00 | 1.13 (0.79–1.63) | 1.17 (0.73–1.89) | 0.76 (0.44–1.31) | 0.25   |
| Kidney disease                              |      |                  |                  |                  |        |
| Any nut                                     |      |                  |                  |                  |        |
| No. of deaths                               | 36   | 50               | 45               | 45               |        |
| Multivariate-adjusted hazard ratio (95% CI) | 1.00 | 0.84 (0.54–1.31) | 0.91 (0.58–1.43) | 0.51 (0.32–0.80) | 0.001  |
| Peanut                                      |      |                  |                  |                  |        |
| No. of deaths                               | 54   | 70               | 28               | 21               |        |
| Multivariate-adjusted hazard ratio (95% CI) | 1.00 | 0.76 (0.52–1.09) | 0.82 (0.51–1.31) | 0.39 (0.23–0.66) | <0.001 |



|                                             |      |                  |                  |                  |      |
|---------------------------------------------|------|------------------|------------------|------------------|------|
| Tree nut                                    |      |                  |                  |                  |      |
| No. of deaths                               | 67   | 63               | 25               | 17               |      |
| Multivariate-adjusted hazard ratio (95% CI) | 1.00 | 0.74 (0.52–1.06) | 1.00 (0.62–1.62) | 0.58 (0.33–1.00) | 0.09 |
| Diabetes                                    |      |                  |                  |                  |      |
| Any nut                                     |      |                  |                  |                  |      |
| No. of deaths                               | 15   | 25               | 13               | 31               |      |
| Multivariate-adjusted hazard ratio (95% CI) | 1.00 | 1.31 (0.65–2.64) | 0.76 (0.34–1.68) | 0.97 (0.49–1.93) | 0.67 |
| Peanut                                      |      |                  |                  |                  |      |
| No. of deaths                               | 24   | 31               | 13               | 15               |      |
| Multivariate-adjusted hazard ratio (95% CI) | 1.00 | 0.84 (0.47–1.51) | 0.89 (0.43–1.84) | 0.63 (0.31–1.28) | 0.23 |
| Tree nut                                    |      |                  |                  |                  |      |
| No. of deaths                               | 28   | 31               | 11               | 12               |      |
| Multivariate-adjusted hazard ratio (95% CI) | 1.00 | 0.95 (0.54–1.66) | 1.12 (0.53–2.37) | 0.89 (0.42–1.89) | 0.81 |
| Other causes                                |      |                  |                  |                  |      |
| Any nut                                     |      |                  |                  |                  |      |
| No. of deaths                               | 364  | 554              | 467              | 798              |      |
| Multivariate-adjusted hazard ratio (95% CI) | 1.00 | 0.94 (0.83–1.08) | 0.88 (0.76–1.01) | 0.90 (0.79–1.03) | 0.24 |
| Peanut                                      |      |                  |                  |                  |      |
| No. of deaths                               | 501  | 877              | 314              | 446              |      |
| Multivariate-adjusted hazard ratio (95% CI) | 1.00 | 0.97 (0.87–1.09) | 0.90 (0.78–1.04) | 0.92 (0.81–1.05) | 0.24 |
| Tree nut                                    |      |                  |                  |                  |      |
| No. of deaths                               | 706  | 883              | 274              | 268              |      |
| Multivariate-adjusted hazard ratio (95% CI) | 1.00 | 0.96 (0.87–1.07) | 0.94 (0.81–1.08) | 0.86 (0.74–1.00) | 0.05 |
| <b>Pooled†</b>                              |      |                  |                  |                  |      |

|                     |                                             |      |                  |                  |                  |        |
|---------------------|---------------------------------------------|------|------------------|------------------|------------------|--------|
| All causes          |                                             |      |                  |                  |                  |        |
| Any nut             |                                             |      |                  |                  |                  |        |
|                     | Multivariate-adjusted hazard ratio (95% CI) | 1.00 | 0.93 (0.90–0.96) | 0.89 (0.86–0.93) | 0.86 (0.82–0.89) | <0.001 |
| Peanut              |                                             |      |                  |                  |                  |        |
|                     | Multivariate-adjusted hazard ratio (95% CI) | 1.00 | 0.92 (0.89–0.95) | 0.91 (0.85–0.96) | 0.88 (0.84–0.93) | <0.001 |
| Tree nut            |                                             |      |                  |                  |                  |        |
|                     | Multivariate-adjusted hazard ratio (95% CI) | 1.00 | 0.95 (0.92–0.98) | 0.93 (0.87–0.98) | 0.83 (0.79–0.88) | <0.001 |
| Cancer              |                                             |      |                  |                  |                  |        |
| Any nut             |                                             |      |                  |                  |                  |        |
|                     | Multivariate-adjusted hazard ratio (95% CI) | 1.00 | 0.93 (0.88–0.98) | 0.93 (0.87–1.00) | 0.91 (0.85–0.97) | 0.05   |
| Peanut              |                                             |      |                  |                  |                  |        |
|                     | Multivariate-adjusted hazard ratio (95% CI) | 1.00 | 0.93 (0.88–0.98) | 0.96 (0.89–1.04) | 0.94 (0.88–1.02) | 0.48   |
| Tree nut            |                                             |      |                  |                  |                  |        |
|                     | Multivariate-adjusted hazard ratio (95% CI) | 1.00 | 0.93 (0.88–0.98) | 0.96 (0.88–1.04) | 0.83 (0.76–0.90) | <0.001 |
| Heart disease       |                                             |      |                  |                  |                  |        |
| Any nut             |                                             |      |                  |                  |                  |        |
|                     | Multivariate-adjusted hazard ratio (95% CI) | 1.00 | 0.84 (0.77–0.91) | 0.78 (0.71–0.86) | 0.74 (0.68–0.81) | <0.001 |
| Peanut              |                                             |      |                  |                  |                  |        |
|                     | Multivariate-adjusted hazard ratio (95% CI) | 1.00 | 0.86 (0.80–0.93) | 0.85 (0.77–0.95) | 0.76 (0.68–0.84) | <0.001 |
| Tree nut            |                                             |      |                  |                  |                  |        |
|                     | Multivariate-adjusted hazard ratio (95% CI) | 1.00 | 0.84 (0.78–0.90) | 0.90 (0.77–1.06) | 0.76 (0.67–0.85) | <0.001 |
| Respiratory disease |                                             |      |                  |                  |                  |        |

|                           |                                             |      |                  |                  |                  |      |
|---------------------------|---------------------------------------------|------|------------------|------------------|------------------|------|
| Any nut                   |                                             |      |                  |                  |                  |      |
|                           | Multivariate-adjusted hazard ratio (95% CI) | 1.00 | 0.95 (0.84–1.08) | 0.91 (0.78–1.06) | 0.81 (0.65–1.01) | 0.21 |
| Peanut                    |                                             |      |                  |                  |                  |      |
|                           | Multivariate-adjusted hazard ratio (95% CI) | 1.00 | 0.91 (0.81–1.02) | 0.87 (0.63–1.22) | 0.84 (0.71–0.99) | 0.04 |
| Tree nut                  |                                             |      |                  |                  |                  |      |
|                           | Multivariate-adjusted hazard ratio (95% CI) | 1.00 | 1.07 (0.96–1.20) | 0.86 (0.63–1.19) | 0.90 (0.74–1.09) | 0.15 |
| Neurodegenerative disease |                                             |      |                  |                  |                  |      |
| Any nut                   |                                             |      |                  |                  |                  |      |
|                           | Multivariate-adjusted hazard ratio (95% CI) | 1.00 | 1.11 (0.97–1.26) | 1.09 (0.94–1.27) | 0.98 (0.80–1.22) | 0.21 |
| Peanut                    |                                             |      |                  |                  |                  |      |
|                           | Multivariate-adjusted hazard ratio (95% CI) | 1.00 | 1.09 (0.97–1.22) | 1.13 (0.92–1.39) | 1.02 (0.84–1.24) | 0.94 |
| Tree nut                  |                                             |      |                  |                  |                  |      |
|                           | Multivariate-adjusted hazard ratio (95% CI) | 1.00 | 1.19 (0.93–1.53) | 0.89 (0.48–1.66) | 0.95 (0.71–1.26) | 0.27 |
| Stroke                    |                                             |      |                  |                  |                  |      |
| Any nut                   |                                             |      |                  |                  |                  |      |
|                           | Multivariate-adjusted hazard ratio (95% CI) | 1.00 | 0.82 (0.70–0.97) | 0.94 (0.79–1.10) | 0.92 (0.79–1.08) | 0.93 |
| Peanut                    |                                             |      |                  |                  |                  |      |
|                           | Multivariate-adjusted hazard ratio (95% CI) | 1.00 | 0.90 (0.79–1.03) | 0.87 (0.71–1.06) | 0.97 (0.67–1.40) | 0.98 |
| Tree nut                  |                                             |      |                  |                  |                  |      |
|                           | Multivariate-adjusted hazard ratio (95% CI) | 1.00 | 0.94 (0.81–1.10) | 0.99 (0.76–1.28) | 0.96 (0.78–1.19) | 0.62 |
| Infections                |                                             |      |                  |                  |                  |      |
| Any nut                   |                                             |      |                  |                  |                  |      |

|                                             |      |                  |                  |                  |      |
|---------------------------------------------|------|------------------|------------------|------------------|------|
| Multivariate-adjusted hazard ratio (95% CI) | 1.00 | 1.07 (0.80–1.43) | 0.86 (0.61–1.21) | 0.79 (0.56–1.11) | 0.04 |
| Peanut                                      |      |                  |                  |                  |      |
| Multivariate-adjusted hazard ratio (95% CI) | 1.00 | 0.83 (0.60–1.14) | 0.66 (0.33–1.32) | 0.68 (0.46–1.00) | 0.03 |
| Tree nut                                    |      |                  |                  |                  |      |
| Multivariate-adjusted hazard ratio (95% CI) | 1.00 | 1.00 (0.78–1.29) | 0.87 (0.44–1.72) | 0.73 (0.47–1.14) | 0.10 |
| Kidney disease                              |      |                  |                  |                  |      |
| Any nut                                     |      |                  |                  |                  |      |
| Multivariate-adjusted hazard ratio (95% CI) | 1.00 | 0.89 (0.67–1.18) | 0.87 (0.62–1.21) | 0.69 (0.38–1.26) | 0.24 |
| Peanut                                      |      |                  |                  |                  |      |
| Multivariate-adjusted hazard ratio (95% CI) | 1.00 | 0.81 (0.62–1.05) | 0.78 (0.53–1.15) | 0.52 (0.27–0.98) | 0.01 |
| Tree nut                                    |      |                  |                  |                  |      |
| Multivariate-adjusted hazard ratio (95% CI) | 1.00 | 0.84 (0.65–1.08) | 0.99 (0.66–1.47) | 0.64 (0.40–1.03) | 0.10 |
| Diabetes                                    |      |                  |                  |                  |      |
| Any nut                                     |      |                  |                  |                  |      |
| Multivariate-adjusted hazard ratio (95% CI) | 1.00 | 0.95 (0.67–1.33) | 0.70 (0.47–1.06) | 0.80 (0.54–1.18) | 0.21 |
| Peanut                                      |      |                  |                  |                  |      |
| Multivariate-adjusted hazard ratio (95% CI) | 1.00 | 0.78 (0.57–1.07) | 0.99 (0.62–1.59) | 0.78 (0.47–1.30) | 0.40 |
| Tree nut                                    |      |                  |                  |                  |      |
| Multivariate-adjusted hazard ratio (95% CI) | 1.00 | 0.76 (0.55–1.04) | 1.05 (0.62–1.76) | 1.01 (0.59–1.73) | 0.95 |
| Other causes                                |      |                  |                  |                  |      |
| Any nut                                     |      |                  |                  |                  |      |
| Multivariate-adjusted                       | 1.00 | 0.96 (0.89–1.03) | 0.87 (0.79–0.95) | 0.87 (0.79–0.94) | 0.05 |

| hazard ratio (95% CI)                       |      |                  |                  |                  |       |
|---------------------------------------------|------|------------------|------------------|------------------|-------|
| Peanut                                      |      |                  |                  |                  |       |
| Multivariate-adjusted hazard ratio (95% CI) | 1.00 | 0.93 (0.87–1.00) | 0.85 (0.76–0.95) | 0.90 (0.81–1.00) | 0.05  |
| Tree nut                                    |      |                  |                  |                  |       |
| Multivariate-adjusted hazard ratio (95% CI) | 1.00 | 0.99 (0.93–1.06) | 0.93 (0.84–1.04) | 0.85 (0.76–0.95) | 0.004 |

\*In women, follow-up is 1980-2010 for total nut and 1986-2010 for peanut and tree nut. In men, follow-up is 1986-2010 for total nut, peanut, and tree nut. Multivariate analyses were adjusted for the same covariates as Figure S1.

†Results from the multivariate model were combined using the random-effects model. *P* values for heterogeneity between women and men were > 0.05 for all categories of nut consumption, except for the first two categories of neurodegenerative disease.

**Table S9.** Subgroup analysis of association between nut consumption and total mortality\*

| Subgroups                                   | Frequency of nut consumption (28g serving) |                  |                  |                  | <i>P</i> for trend | <i>P</i> for interaction‡ |
|---------------------------------------------|--------------------------------------------|------------------|------------------|------------------|--------------------|---------------------------|
|                                             | Never                                      | < Once/week      | Once/week        | ≥2 times/week    |                    |                           |
| Nut intake (servings/day)                   | 0                                          | 0.01-0.09        | 0.10-0.19        | ≥0.20            |                    |                           |
| <b>Women</b>                                |                                            |                  |                  |                  |                    |                           |
| All women                                   |                                            |                  |                  |                  |                    |                           |
| No. of person-years                         | 390915                                     | 973667           | 384892           | 386008           |                    |                           |
| No. of deaths                               | 3343                                       | 7486             | 2663             | 2708             |                    |                           |
| Multivariate-adjusted hazard ratio (95% CI) | 1.00                                       | 0.94 (0.90–0.98) | 0.88 (0.83–0.92) | 0.85 (0.80–0.89) | <0.001             |                           |
| Age                                         |                                            |                  |                  |                  |                    |                           |
| <60 yr                                      |                                            |                  |                  |                  |                    |                           |
| No. of person-years                         | 247281                                     | 496898           | 184859           | 175662           |                    |                           |
| No. of deaths                               | 655                                        | 1039             | 353              | 308              |                    |                           |
| Multivariate-adjusted hazard ratio (95% CI) | 1.00                                       | 0.89 (0.80–0.98) | 0.83 (0.72–0.95) | 0.74 (0.65–0.86) | <0.001             |                           |
| ≥60 yr                                      |                                            |                  |                  |                  |                    |                           |
| No. of person-years                         | 143634                                     | 476770           | 200033           | 210346           |                    |                           |
| No. of deaths                               | 2688                                       | 6447             | 2310             | 2400             |                    |                           |
| Multivariate-adjusted hazard ratio (95% CI) | 1.00                                       | 0.95 (0.90–0.99) | 0.89 (0.84–0.94) | 0.87 (0.82–0.92) | <0.001             |                           |
| Body-mass index                             |                                            |                  |                  |                  |                    |                           |
| <25 kg/m <sup>2</sup>                       |                                            |                  |                  |                  |                    |                           |
| No. of person-years                         | 200928                                     | 481567           | 197379           | 218096           |                    |                           |
| No. of deaths                               | 1688                                       | 3922             | 1521             | 1630             |                    |                           |
| Multivariate-adjusted hazard ratio (95% CI) | 1.00                                       | 0.96 (0.90–1.01) | 0.93 (0.87–1.00) | 0.88 (0.82–0.95) | <0.001             |                           |
| 25 to <30 kg/m <sup>2</sup>                 |                                            |                  |                  |                  |                    |                           |
| No. of person-years                         | 114572                                     | 303193           | 119957           | 112632           |                    |                           |
| No. of deaths                               | 941                                        | 2091             | 679              | 678              |                    |                           |

|                                             |        |                  |                  |                  |        |      |
|---------------------------------------------|--------|------------------|------------------|------------------|--------|------|
| Multivariate-adjusted hazard ratio (95% CI) | 1.00   | 0.92 (0.85–1.00) | 0.80 (0.73–0.89) | 0.79 (0.72–0.88) | <0.001 |      |
| ≥30 kg/m <sup>2</sup>                       |        |                  |                  |                  |        |      |
| No. of person-years                         | 75415  | 188907           | 67556            | 55280            |        |      |
| No. of deaths                               | 714    | 1473             | 463              | 400              |        |      |
| Multivariate-adjusted hazard ratio (95% CI) | 1.00   | 0.92 (0.83–1.00) | 0.84 (0.74–0.95) | 0.84 (0.74–0.96) | 0.01   |      |
| Physical activity                           |        |                  |                  |                  |        | 0.52 |
| Below median                                |        |                  |                  |                  |        |      |
| No. of person-years                         | 257318 | 553983           | 201240           | 189103           |        |      |
| No. of deaths                               | 2543   | 5330             | 1775             | 1729             |        |      |
| Multivariate-adjusted hazard ratio (95% CI) | 1.00   | 0.94 (0.89–0.98) | 0.87 (0.82–0.93) | 0.85 (0.79–0.90) | <0.001 |      |
| Above median                                |        |                  |                  |                  |        |      |
| No. of person-years                         | 133598 | 419684           | 183652           | 196905           |        |      |
| No. of deaths                               | 800    | 2156             | 888              | 979              |        |      |
| Multivariate-adjusted hazard ratio (95% CI) | 1.00   | 0.92 (0.85–1.00) | 0.88 (0.80–0.97) | 0.85 (0.77–0.94) | 0.005  |      |
| Smoking status                              |        |                  |                  |                  |        | 0.06 |
| Never                                       |        |                  |                  |                  |        |      |
| No. of person-years                         | 170958 | 445203           | 179076           | 175903           |        |      |
| No. of deaths                               | 1256   | 2737             | 1005             | 1069             |        |      |
| Multivariate-adjusted hazard ratio (95% CI) | 1.00   | 0.93 (0.87–0.99) | 0.89 (0.81–0.96) | 0.89 (0.81–0.97) | 0.02   |      |
| Ever                                        |        |                  |                  |                  |        |      |
| No. of person-years                         | 219957 | 528465           | 205816           | 210104           |        |      |
| No. of deaths                               | 2087   | 4749             | 1658             | 1639             |        |      |
| Multivariate-adjusted hazard ratio (95% CI) | 1.00   | 0.94 (0.89–0.99) | 0.87 (0.81–0.93) | 0.82 (0.77–0.88) | <0.001 |      |
| Alcohol consumption                         |        |                  |                  |                  |        | 0.22 |

|                                             |        |                  |                  |                  |        |      |
|---------------------------------------------|--------|------------------|------------------|------------------|--------|------|
| Non-drinker                                 |        |                  |                  |                  |        |      |
| No. of person-years                         | 221380 | 468332           | 167174           | 166787           |        |      |
| No. of deaths                               | 2637   | 5256             | 1758             | 1772             |        |      |
| Multivariate-adjusted hazard ratio (95% CI) | 1.00   | 0.94 (0.90–0.99) | 0.88 (0.83–0.94) | 0.85 (0.80–0.91) | <0.001 |      |
| Drinker                                     |        |                  |                  |                  |        |      |
| No. of person-years                         | 169535 | 505335           | 217718           | 219221           |        |      |
| No. of deaths                               | 706    | 2230             | 905              | 936              |        |      |
| Multivariate-adjusted hazard ratio (95% CI) | 1.00   | 0.90 (0.83–0.98) | 0.85 (0.77–0.94) | 0.83 (0.74–0.91) | 0.002  |      |
| Physical examination for screening purposes |        |                  |                  |                  |        | 0.51 |
| No                                          |        |                  |                  |                  |        |      |
| No. of person-years                         | 183983 | 355348           | 133910           | 133658           |        |      |
| No. of deaths                               | 2404   | 4603             | 1614             | 1641             |        |      |
| Multivariate-adjusted hazard ratio (95% CI) | 1.00   | 0.96 (0.91–1.01) | 0.90 (0.85–0.96) | 0.87 (0.81–0.93) | <0.001 |      |
| Yes                                         |        |                  |                  |                  |        |      |
| No. of person-years                         | 206932 | 618319           | 250982           | 252350           |        |      |
| No. of deaths                               | 939    | 2883             | 1049             | 1067             |        |      |
| Multivariate-adjusted hazard ratio (95% CI) | 1.00   | 0.88 (0.82–0.95) | 0.83 (0.75–0.91) | 0.80 (0.73–0.88) | <0.001 |      |
| Multivitamin use                            |        |                  |                  |                  |        | 0.76 |
| No                                          |        |                  |                  |                  |        |      |
| No. of person-years                         | 242722 | 531176           | 191538           | 174387           |        |      |
| No. of deaths                               | 1810   | 3483             | 1182             | 1024             |        |      |
| Multivariate-adjusted hazard ratio (95% CI) | 1.00   | 0.93 (0.88–0.99) | 0.91 (0.85–0.99) | 0.83 (0.77–0.90) | <0.001 |      |
| Yes                                         |        |                  |                  |                  |        |      |
| No. of person-years                         | 148193 | 442491           | 193354           | 211621           |        |      |



|                                             |        |                  |                  |                  |        |      |
|---------------------------------------------|--------|------------------|------------------|------------------|--------|------|
| No. of deaths                               | 1533   | 4003             | 1481             | 1684             |        |      |
| Multivariate-adjusted hazard ratio (95% CI) | 1.00   | 0.93 (0.88–0.99) | 0.85 (0.79–0.91) | 0.85 (0.79–0.91) | <0.001 |      |
| Red/processed meat consumption              |        |                  |                  |                  |        | 0.04 |
| Below median                                |        |                  |                  |                  |        |      |
| No. of person-years                         | 204503 | 488241           | 185162           | 194062           |        |      |
| No. of deaths                               | 1799   | 3851             | 1330             | 1344             |        |      |
| Multivariate-adjusted hazard ratio (95% CI) | 1.00   | 0.93 (0.87–0.98) | 0.87 (0.81–0.93) | 0.80 (0.74–0.86) | <0.001 |      |
| Above median                                |        |                  |                  |                  |        |      |
| No. of person-years                         | 186412 | 485426           | 199730           | 191946           |        |      |
| No. of deaths                               | 1544   | 3635             | 1333             | 1364             |        |      |
| Multivariate-adjusted hazard ratio (95% CI) | 1.00   | 0.95 (0.89–1.01) | 0.89 (0.83–0.96) | 0.90 (0.83–0.97) | 0.01   |      |
| Fruit consumption                           |        |                  |                  |                  |        | 0.41 |
| Below median                                |        |                  |                  |                  |        |      |
| No. of person-years                         | 231410 | 517246           | 176502           | 148254           |        |      |
| No. of deaths                               | 1931   | 3686             | 1122             | 993              |        |      |
| Multivariate-adjusted hazard ratio (95% CI) | 1.00   | 0.90 (0.85–0.96) | 0.82 (0.76–0.89) | 0.81 (0.75–0.88) | <0.001 |      |
| Above median                                |        |                  |                  |                  |        |      |
| No. of person-years                         | 159505 | 456421           | 208390           | 237754           |        |      |
| No. of deaths                               | 1412   | 3800             | 1541             | 1715             |        |      |
| Multivariate-adjusted hazard ratio (95% CI) | 1.00   | 0.98 (0.92–1.04) | 0.94 (0.87–1.01) | 0.89 (0.83–0.96) | <0.001 |      |
| Vegetable consumption                       |        |                  |                  |                  |        | 0.52 |
| Below median                                |        |                  |                  |                  |        |      |
| No. of person-years                         | 257457 | 507488           | 165675           | 142537           |        |      |
| No. of deaths                               | 2135   | 3692             | 1087             | 980              |        |      |

|                                             |        |                  |                  |                  |        |
|---------------------------------------------|--------|------------------|------------------|------------------|--------|
| Multivariate-adjusted hazard ratio (95% CI) | 1.00   | 0.91 (0.86–0.96) | 0.85 (0.79–0.92) | 0.85 (0.78–0.91) | <0.001 |
| Above median                                |        |                  |                  |                  |        |
| No. of person-years                         | 133458 | 466179           | 219217           | 243470           |        |
| No. of deaths                               | 1208   | 3794             | 1576             | 1728             |        |
| Multivariate-adjusted hazard ratio (95% CI) | 1.00   | 0.97 (0.91–1.03) | 0.90 (0.84–0.98) | 0.86 (0.80–0.93) | <0.001 |
| Menopausal status and hormone use           |        |                  |                  |                  | 0.12   |
| Premenopausal                               |        |                  |                  |                  |        |
| No. of person-years                         | 183068 | 327702           | 120057           | 113419           |        |
| No. of deaths                               | 1816   | 3268             | 1119             | 1139             |        |
| Multivariate-adjusted hazard ratio (95% CI) | 1.00   | 0.96 (0.91–1.02) | 0.91 (0.84–0.98) | 0.89 (0.83–0.97) | 0.004  |
| Postmenopausal never users                  |        |                  |                  |                  |        |
| No. of person-years                         | 87300  | 212494           | 79045            | 80498            |        |
| No. of deaths                               | 635    | 1474             | 500              | 468              |        |
| Multivariate-adjusted hazard ratio (95% CI) | 1.00   | 0.89 (0.81–0.98) | 0.85 (0.76–0.96) | 0.79 (0.70–0.90) | 0.001  |
| Postmenopausal past users                   |        |                  |                  |                  |        |
| No. of person-years                         | 63424  | 215954           | 93481            | 98784            |        |
| No. of deaths                               | 677    | 1991             | 751              | 802              |        |
| Multivariate-adjusted hazard ratio (95% CI) | 1.00   | 0.97 (0.83–1.14) | 0.89 (0.74–1.06) | 0.83 (0.69–1.00) | 0.01   |
| Postmenopausal current users                |        |                  |                  |                  |        |
| No. of person-years                         | 57123  | 217517           | 92309            | 93306            |        |
| No. of deaths                               | 215    | 753              | 293              | 299              |        |
| Multivariate-adjusted hazard ratio (95% CI) | 1.00   | 0.88 (0.81–0.96) | 0.82 (0.73–0.91) | 0.79 (0.71–0.88) | <0.001 |

## Men

### All men

|                                             |        |                  |                  |                  |        |
|---------------------------------------------|--------|------------------|------------------|------------------|--------|
| No. of person-years                         | 130848 | 228338           | 217025           | 327160           |        |
| No. of deaths                               | 1860   | 2801             | 2518             | 4050             |        |
| Multivariate-adjusted hazard ratio (95% CI) | 1.00   | 0.91 (0.85–0.96) | 0.91 (0.86–0.97) | 0.87 (0.82–0.92) | <0.001 |

### Age

0.11

#### <60 yr

|                                             |       |                  |                  |                  |      |
|---------------------------------------------|-------|------------------|------------------|------------------|------|
| No. of person-years                         | 62157 | 93840            | 94141            | 120456           |      |
| No. of deaths                               | 163   | 188              | 207              | 285              |      |
| Multivariate-adjusted hazard ratio (95% CI) | 1.00  | 0.79 (0.63–0.98) | 0.86 (0.69–1.06) | 0.90 (0.73–1.10) | 0.90 |

#### ≥60 yr

|                                             |       |                  |                  |                  |        |
|---------------------------------------------|-------|------------------|------------------|------------------|--------|
| No. of person-years                         | 68691 | 134498           | 122885           | 206703           |        |
| No. of deaths                               | 1697  | 2613             | 2311             | 3765             |        |
| Multivariate-adjusted hazard ratio (95% CI) | 1.00  | 0.92 (0.86–0.97) | 0.92 (0.86–0.98) | 0.86 (0.81–0.92) | <0.001 |

### Body-mass index

0.32

#### <25 kg/m<sup>2</sup>

|                                             |       |                  |                  |                  |      |
|---------------------------------------------|-------|------------------|------------------|------------------|------|
| No. of person-years                         | 75211 | 116220           | 110612           | 174137           |      |
| No. of deaths                               | 1436  | 2088             | 1863             | 3070             |      |
| Multivariate-adjusted hazard ratio (95% CI) | 1.00  | 0.97 (0.91–1.04) | 0.97 (0.90–1.04) | 0.93 (0.87–0.99) | 0.02 |

#### 25 to <30 kg/m<sup>2</sup>

|                                             |       |                  |                  |                  |       |
|---------------------------------------------|-------|------------------|------------------|------------------|-------|
| No. of person-years                         | 44707 | 89080            | 85204            | 123955           |       |
| No. of deaths                               | 326   | 564              | 487              | 763              |       |
| Multivariate-adjusted hazard ratio (95% CI) | 1.00  | 0.76 (0.66–0.88) | 0.74 (0.64–0.86) | 0.71 (0.62–0.81) | 0.001 |

#### ≥30 kg/m<sup>2</sup>

|                     |       |       |       |       |  |
|---------------------|-------|-------|-------|-------|--|
| No. of person-years | 10931 | 23038 | 21210 | 29068 |  |
|---------------------|-------|-------|-------|-------|--|

|                                             |       |                  |                  |                  |       |      |
|---------------------------------------------|-------|------------------|------------------|------------------|-------|------|
| No. of deaths                               | 98    | 149              | 168              | 217              |       |      |
| Multivariate-adjusted hazard ratio (95% CI) | 1.00  | 0.65 (0.50–0.85) | 0.84 (0.65–1.10) | 0.68 (0.52–0.87) | 0.07  |      |
| Physical activity                           |       |                  |                  |                  |       | 0.10 |
| Below median                                |       |                  |                  |                  |       |      |
| No. of person-years                         | 76315 | 116561           | 106062           | 149434           |       |      |
| No. of deaths                               | 1338  | 1948             | 1698             | 2617             |       |      |
| Multivariate-adjusted hazard ratio (95% CI) | 1.00  | 0.93 (0.87–1.00) | 0.95 (0.88–1.02) | 0.89 (0.83–0.96) | 0.004 |      |
| Above median                                |       |                  |                  |                  |       |      |
| No. of person-years                         | 54533 | 111777           | 110963           | 177726           |       |      |
| No. of deaths                               | 522   | 853              | 820              | 1433             |       |      |
| Multivariate-adjusted hazard ratio (95% CI) | 1.00  | 0.83 (0.74–0.92) | 0.82 (0.73–0.92) | 0.79 (0.71–0.88) | 0.004 |      |
| Smoking status                              |       |                  |                  |                  |       | 0.53 |
| Never                                       |       |                  |                  |                  |       |      |
| No. of person-years                         | 67183 | 118954           | 110535           | 162424           |       |      |
| No. of deaths                               | 741   | 1230             | 1051             | 1693             |       |      |
| Multivariate-adjusted hazard ratio (95% CI) | 1.00  | 0.99 (0.90–1.08) | 0.96 (0.87–1.06) | 0.89 (0.82–0.98) | 0.002 |      |
| Ever                                        |       |                  |                  |                  |       |      |
| No. of person-years                         | 63665 | 109384           | 106490           | 164736           |       |      |
| No. of deaths                               | 1119  | 1571             | 1467             | 2357             |       |      |
| Multivariate-adjusted hazard ratio (95% CI) | 1.00  | 0.85 (0.79–0.92) | 0.89 (0.82–0.96) | 0.85 (0.79–0.92) | 0.008 |      |
| Alcohol consumption                         |       |                  |                  |                  |       | 0.08 |
| Non-drinker                                 |       |                  |                  |                  |       |      |
| No. of person-years                         | 63332 | 87113            | 79208            | 114305           |       |      |
| No. of deaths                               | 1268  | 1697             | 1455             | 2329             |       |      |
| Multivariate-adjusted                       | 1.00  | 0.95 (0.88–1.02) | 0.93 (0.86–1.01) | 0.90 (0.84–0.97) | 0.007 |      |

|                                                    |                                             | hazard ratio (95% CI) |                  |                  |                  |        |
|----------------------------------------------------|---------------------------------------------|-----------------------|------------------|------------------|------------------|--------|
| <b>Drinker</b>                                     |                                             |                       |                  |                  |                  |        |
| No.                                                | No. of person-years                         | 67516                 | 141225           | 137818           | 212855           |        |
| No.                                                | of deaths                                   | 592                   | 1104             | 1063             | 1721             |        |
|                                                    | Multivariate-adjusted hazard ratio (95% CI) | 1.00                  | 0.79 (0.72–0.88) | 0.84 (0.75–0.93) | 0.78 (0.71–0.86) | 0.002  |
| <b>Physical examination for screening purposes</b> |                                             |                       |                  |                  |                  | 0.37   |
| <b>No</b>                                          |                                             |                       |                  |                  |                  |        |
| No.                                                | of person-years                             | 70194                 | 98996            | 98852            | 141256           |        |
| No.                                                | of deaths                                   | 1394                  | 1930             | 1710             | 2732             |        |
|                                                    | Multivariate-adjusted hazard ratio (95% CI) | 1.00                  | 0.93 (0.86–0.99) | 0.90 (0.84–0.97) | 0.88 (0.82–0.94) | 0.001  |
| <b>Yes</b>                                         |                                             |                       |                  |                  |                  |        |
| No.                                                | of person-years                             | 60654                 | 129343           | 118173           | 185904           |        |
| No.                                                | of deaths                                   | 466                   | 871              | 808              | 1318             |        |
|                                                    | Multivariate-adjusted hazard ratio (95% CI) | 1.00                  | 0.84 (0.75–0.94) | 0.91 (0.81–1.03) | 0.82 (0.74–0.92) | 0.01   |
| <b>Multivitamin use</b>                            |                                             |                       |                  |                  |                  | 0.24   |
| <b>No</b>                                          |                                             |                       |                  |                  |                  |        |
| No.                                                | of person-years                             | 78766                 | 118042           | 114665           | 158810           |        |
| No.                                                | of deaths                                   | 1065                  | 1399             | 1271             | 1937             |        |
|                                                    | Multivariate-adjusted hazard ratio (95% CI) | 1.00                  | 0.89 (0.82–0.97) | 0.91 (0.84–0.99) | 0.87 (0.81–0.95) | 0.01   |
| <b>Yes</b>                                         |                                             |                       |                  |                  |                  |        |
| No.                                                | of person-years                             | 52082                 | 110297           | 102360           | 168350           |        |
| No.                                                | of deaths                                   | 795                   | 1402             | 1247             | 2113             |        |
|                                                    | Multivariate-adjusted hazard ratio (95% CI) | 1.00                  | 0.90 (0.82–0.98) | 0.90 (0.83–0.99) | 0.85 (0.78–0.92) | <0.001 |
| <b>Red/processed meat consumption</b>              |                                             |                       |                  |                  |                  | 0.74   |

|                                             |       |                  |                  |                  |        |      |
|---------------------------------------------|-------|------------------|------------------|------------------|--------|------|
| Below median                                |       |                  |                  |                  |        |      |
| No. of person-years                         | 72900 | 122775           | 103365           | 153357           |        |      |
| No. of deaths                               | 999   | 1418             | 1180             | 1826             |        |      |
| Multivariate-adjusted hazard ratio (95% CI) | 1.00  | 0.87 (0.80–0.94) | 0.91 (0.83–0.99) | 0.84 (0.77–0.91) | 0.001  |      |
| Above median                                |       |                  |                  |                  |        |      |
| No. of person-years                         | 57948 | 105563           | 113660           | 173803           |        |      |
| No. of deaths                               | 861   | 1383             | 1338             | 2224             |        |      |
| Multivariate-adjusted hazard ratio (95% CI) | 1.00  | 0.95 (0.87–1.03) | 0.92 (0.84–1.01) | 0.89 (0.82–0.97) | 0.01   |      |
| Fruit consumption                           |       |                  |                  |                  |        | 0.11 |
| Below median                                |       |                  |                  |                  |        |      |
| No. of person-years                         | 78016 | 126100           | 111631           | 139491           |        |      |
| No. of deaths                               | 999   | 1380             | 1155             | 1573             |        |      |
| Multivariate-adjusted hazard ratio (95% CI) | 1.00  | 0.91 (0.84–0.99) | 0.95 (0.87–1.03) | 0.90 (0.83–0.98) | 0.10   |      |
| Above median                                |       |                  |                  |                  |        |      |
| No. of person-years                         | 52833 | 102239           | 105394           | 187669           |        |      |
| No. of deaths                               | 861   | 1421             | 1363             | 2477             |        |      |
| Multivariate-adjusted hazard ratio (95% CI) | 1.00  | 0.89 (0.82–0.97) | 0.88 (0.80–0.96) | 0.83 (0.77–0.90) | <0.001 |      |
| Vegetable consumption                       |       |                  |                  |                  |        | 0.65 |
| Below median                                |       |                  |                  |                  |        |      |
| No. of person-years                         | 79379 | 128391           | 109971           | 137760           |        |      |
| No. of deaths                               | 1124  | 1517             | 1195             | 1607             |        |      |
| Multivariate-adjusted hazard ratio (95% CI) | 1.00  | 0.91 (0.84–0.99) | 0.91 (0.84–0.99) | 0.86 (0.80–0.93) | 0.001  |      |
| Above median                                |       |                  |                  |                  |        |      |
| No. of person-years                         | 51469 | 99948            | 107055           | 189400           |        |      |
| No. of deaths                               | 736   | 1284             | 1323             | 2443             |        |      |

|                                             |      |                  |                  |                  |        |      |
|---------------------------------------------|------|------------------|------------------|------------------|--------|------|
| Multivariate-adjusted hazard ratio (95% CI) | 1.00 | 0.90 (0.82–0.99) | 0.91 (0.83–1.00) | 0.87 (0.80–0.95) | 0.01   |      |
| <b>Pooled†</b>                              |      |                  |                  |                  |        |      |
| All participants                            |      |                  |                  |                  |        |      |
| Multivariate-adjusted hazard ratio (95% CI) | 1.00 | 0.93 (0.90–0.96) | 0.89 (0.86–0.93) | 0.86 (0.82–0.89) | <0.001 |      |
| Age                                         |      |                  |                  |                  |        | 0.86 |
| <60 yr                                      |      |                  |                  |                  |        |      |
| Multivariate-adjusted hazard ratio (95% CI) | 1.00 | 0.87 (0.79–0.95) | 0.84 (0.75–0.93) | 0.80 (0.67–0.96) | 0.35   |      |
| ≥60 yr                                      |      |                  |                  |                  |        |      |
| Multivariate-adjusted hazard ratio (95% CI) | 1.00 | 0.94 (0.90–0.97) | 0.90 (0.86–0.94) | 0.86 (0.83–0.90) | <0.001 |      |
| Body-mass index                             |      |                  |                  |                  |        | 0.04 |
| <25 kg/m <sup>2</sup>                       |      |                  |                  |                  |        |      |
| Multivariate-adjusted hazard ratio (95% CI) | 1.00 | 0.96 (0.92–1.01) | 0.95 (0.91–1.00) | 0.91 (0.86–0.96) | 0.003  |      |
| 25 to <30 kg/m <sup>2</sup>                 |      |                  |                  |                  |        |      |
| Multivariate-adjusted hazard ratio (95% CI) | 1.00 | 0.85 (0.70–1.02) | 0.78 (0.72–0.85) | 0.76 (0.68–0.84) | <0.001 |      |
| ≥30 kg/m <sup>2</sup>                       |      |                  |                  |                  |        |      |
| Multivariate-adjusted hazard ratio (95% CI) | 1.00 | 0.79 (0.57–1.10) | 0.84 (0.75–0.94) | 0.78 (0.63–0.96) | 0.002  |      |
| Physical activity                           |      |                  |                  |                  |        | 0.94 |
| Below median                                |      |                  |                  |                  |        |      |
| Multivariate-adjusted hazard ratio (95% CI) | 1.00 | 0.93 (0.90–0.97) | 0.91 (0.84–0.98) | 0.87 (0.82–0.92) | 0.004  |      |
| Above median                                |      |                  |                  |                  |        |      |
| Multivariate-adjusted hazard ratio (95% CI) | 1.00 | 0.88 (0.79–0.98) | 0.85 (0.79–0.92) | 0.82 (0.77–0.88) | <0.001 |      |

|                                             |      |                  |                  |                  |        |  |      |
|---------------------------------------------|------|------------------|------------------|------------------|--------|--|------|
| Smoking status                              |      |                  |                  |                  |        |  | 0.61 |
| Never                                       |      |                  |                  |                  |        |  |      |
| Multivariate-adjusted hazard ratio (95% CI) | 1.00 | 0.95 (0.90–1.00) | 0.92 (0.85–1.00) | 0.89 (0.84–0.95) | <0.001 |  |      |
| Ever                                        |      |                  |                  |                  |        |  |      |
| Multivariate-adjusted hazard ratio (95% CI) | 1.00 | 0.90 (0.82–0.99) | 0.88 (0.83–0.92) | 0.83 (0.79–0.88) | 0.01   |  |      |
| Alcohol consumption                         |      |                  |                  |                  |        |  | 0.83 |
| Non-drinker                                 |      |                  |                  |                  |        |  |      |
| Multivariate-adjusted hazard ratio (95% CI) | 1.00 | 0.94 (0.91–0.98) | 0.90 (0.85–0.95) | 0.87 (0.83–0.92) | 0.002  |  |      |
| Drinker                                     |      |                  |                  |                  |        |  |      |
| Multivariate-adjusted hazard ratio (95% CI) | 1.00 | 0.85 (0.75–0.96) | 0.84 (0.78–0.91) | 0.80 (0.75–0.86) | <0.001 |  |      |
| Physical examination for screening purposes |      |                  |                  |                  |        |  | 0.55 |
| No                                          |      |                  |                  |                  |        |  |      |
| Multivariate-adjusted hazard ratio (95% CI) | 1.00 | 0.95 (0.91–0.99) | 0.90 (0.86–0.95) | 0.87 (0.83–0.92) | <0.001 |  |      |
| Yes                                         |      |                  |                  |                  |        |  |      |
| Multivariate-adjusted hazard ratio (95% CI) | 1.00 | 0.87 (0.81–0.92) | 0.86 (0.78–0.95) | 0.81 (0.75–0.87) | <0.001 |  |      |
| Multivitamin use                            |      |                  |                  |                  |        |  | 0.96 |
| No                                          |      |                  |                  |                  |        |  |      |
| Multivariate-adjusted hazard ratio (95% CI) | 1.00 | 0.92 (0.88–0.96) | 0.91 (0.86–0.96) | 0.85 (0.81–0.90) | 0.01   |  |      |
| Yes                                         |      |                  |                  |                  |        |  |      |
| Multivariate-adjusted hazard ratio (95% CI) | 1.00 | 0.92 (0.88–0.97) | 0.87 (0.82–0.93) | 0.85 (0.80–0.90) | <0.001 |  |      |



|                                             |      |                  |                  |                  |        |      |
|---------------------------------------------|------|------------------|------------------|------------------|--------|------|
| Red/processed meat consumption              |      |                  |                  |                  |        | 0.22 |
| Below median                                |      |                  |                  |                  |        |      |
| Multivariate-adjusted hazard ratio (95% CI) | 1.00 | 0.90 (0.85–0.96) | 0.88 (0.83–0.93) | 0.82 (0.77–0.86) | 0.004  |      |
| Above median                                |      |                  |                  |                  |        |      |
| Multivariate-adjusted hazard ratio (95% CI) | 1.00 | 0.95 (0.90–1.00) | 0.90 (0.85–0.96) | 0.90 (0.85–0.95) | <0.001 |      |
| Fruit consumption                           |      |                  |                  |                  |        | 0.89 |
| Below median                                |      |                  |                  |                  |        |      |
| Multivariate-adjusted hazard ratio (95% CI) | 1.00 | 0.91 (0.86–0.95) | 0.88 (0.77–1.01) | 0.85 (0.77–0.95) | 0.08   |      |
| Above median                                |      |                  |                  |                  |        |      |
| Multivariate-adjusted hazard ratio (95% CI) | 1.00 | 0.94 (0.86–1.03) | 0.91 (0.86–0.97) | 0.86 (0.81–0.92) | <0.001 |      |
| Vegetable consumption                       |      |                  |                  |                  |        | 0.75 |
| Below median                                |      |                  |                  |                  |        |      |
| Multivariate-adjusted hazard ratio (95% CI) | 1.00 | 0.91 (0.87–0.96) | 0.88 (0.82–0.94) | 0.85 (0.81–0.90) | <0.001 |      |
| Above median                                |      |                  |                  |                  |        |      |
| Multivariate-adjusted hazard ratio (95% CI) | 1.00 | 0.94 (0.88–1.01) | 0.91 (0.85–0.96) | 0.86 (0.82–0.91) | <0.001 |      |

\*Multivariate analyses were adjusted for the same covariates as Figure S1.

†Results from the multivariate model were combined using the random-effects model. *P* values for heterogeneity between women and men were > 0.05 for all categories of nut consumption.

‡For separate analysis of women and men, *P* values for interactions were calculated using the likelihood-ratio test comparing Cox proportional-hazards models with and without cross-product terms for each level of stratifying variables, with nut consumption as a median trend variable. For the pooled analysis, *P* values for interactions were calculated using the Q statistic comparing the subgroup-specific pooled multivariate hazard ratios for nut consumption as a median trend variable.
